# Supplementary material for: Interconversion between a planar 1,3-dichlorobicyclo[1.1.0]tetrasilane and a (chloro)(chlorosilyl)cyclotrisilene
Source: Royal Society of Chemistry journal article supplement (doi:10.1039/d0dt03408h), 2020-01-01
Supplement: d0dt03408h1.pdf [file d0dt03408h1.pdf]

## Electronic Supplementary Information

Interconversion between a planar 1,3-dichlorobicyclo[1.1.0]tetrasilane

and a (chloro)(chlorosilyl)cyclotrisilene

*Takumi Nukazawa and Takeaki Iwamoto\**

Department of Chemistry, Graduate School of Science, Tohoku University, Sendai 980-8578, Japan

Email: [takeaki.iwamoto@tohoku.ac.jp](mailto:takeaki.iwamoto@tohoku.ac.jp)

### Contents

|                                                                                                                   |     |
|-------------------------------------------------------------------------------------------------------------------|-----|
| 1. NMR spectra .....                                                                                              | S2  |
| 2. X-Ray diffraction analysis .....                                                                               | S11 |
| 3. UV-vis absorption spectrum.....                                                                                | S12 |
| 4. Computational study .....                                                                                      | S13 |
| 5. Preliminary estimation of the thermodynamic parameters for the equilibrium between <b>4</b> and <b>6</b> ..... | S23 |

# 1. NMR spectra

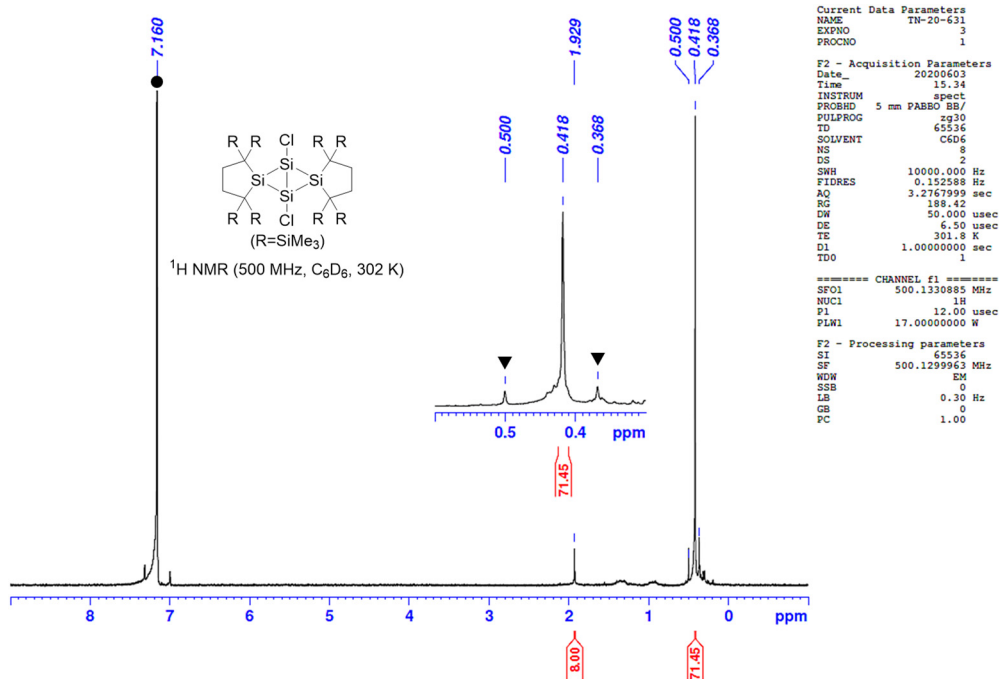

Figure S1.  $^1\text{H}$  NMR spectrum of **4** in  $\text{C}_6\text{D}_6$  at 302 K (● =  $\text{C}_6\text{HD}_5$ , ▼ = **6**).

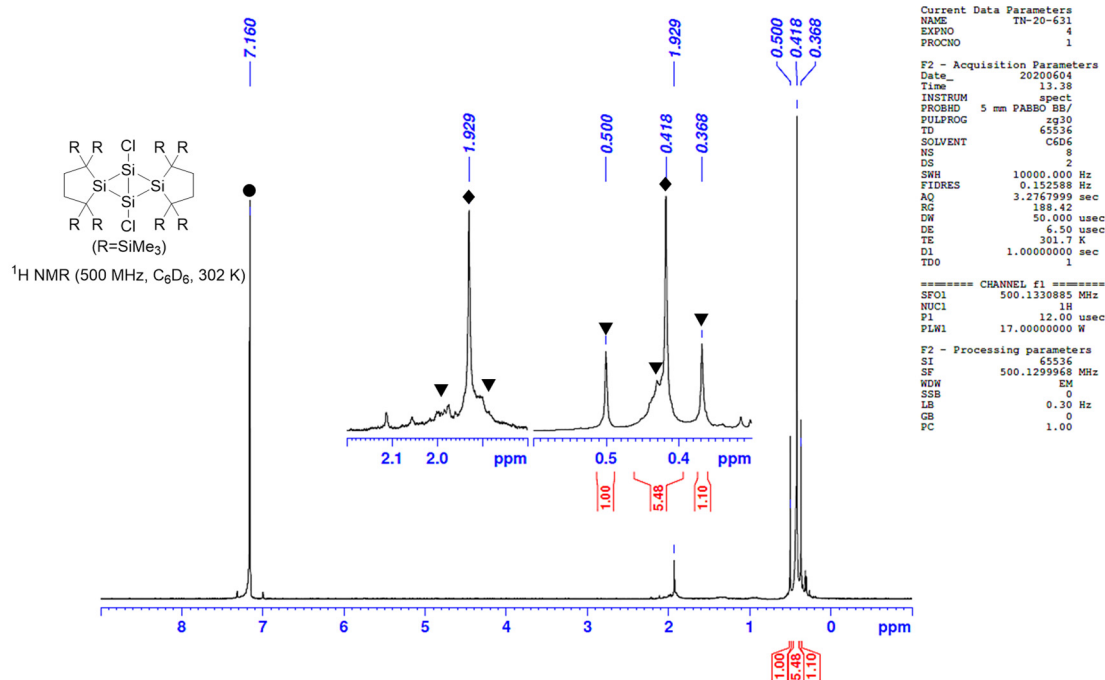

Figure S2.  $^1\text{H}$  NMR spectrum of **4** in  $\text{C}_6\text{D}_6$  at 302 K after 1 day (● =  $\text{C}_6\text{HD}_5$ , ◆ = **4**, ▼ = **6**).

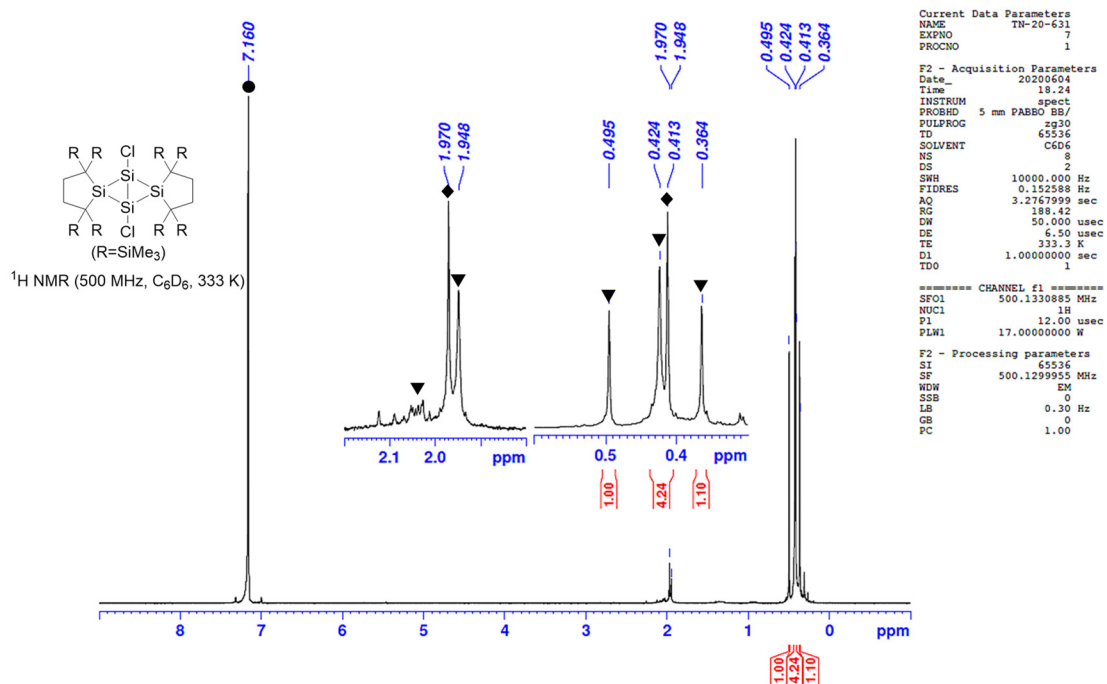

Figure S3. <sup>1</sup>H NMR spectrum of 4 in C<sub>6</sub>D<sub>6</sub> at 333 K (● = C<sub>6</sub>HD<sub>5</sub>, ◆ = 4, ▼ = 6).

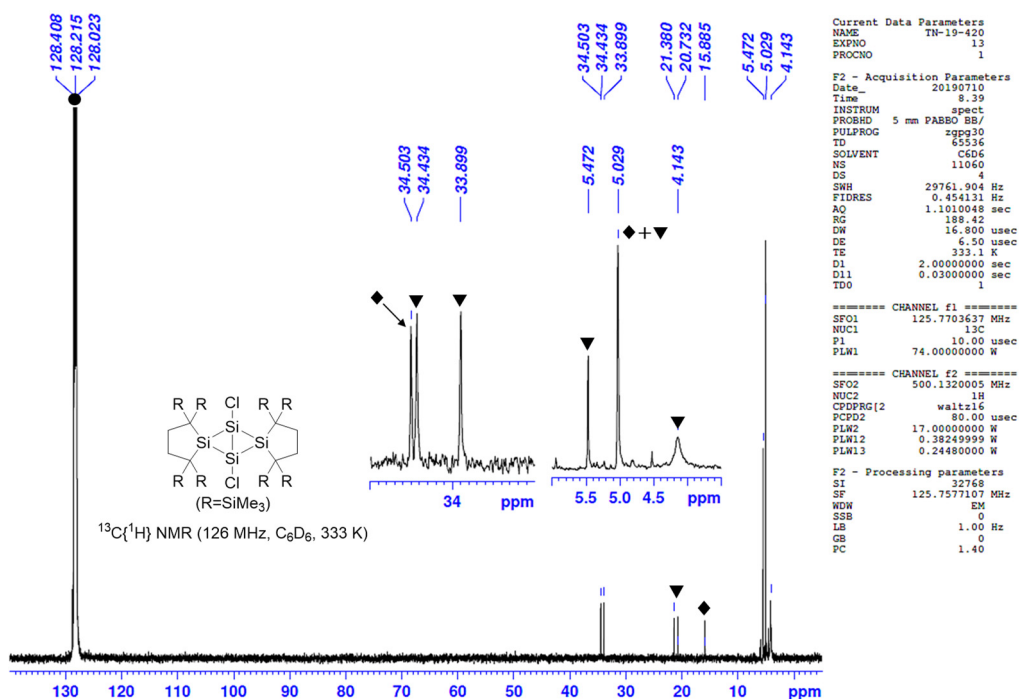

Figure S4. <sup>13</sup>C{<sup>1</sup>H} NMR spectrum of 4 in C<sub>6</sub>D<sub>6</sub> in 333 K (● = C<sub>6</sub>D<sub>6</sub>, ◆ = 4, ▼ = 6).

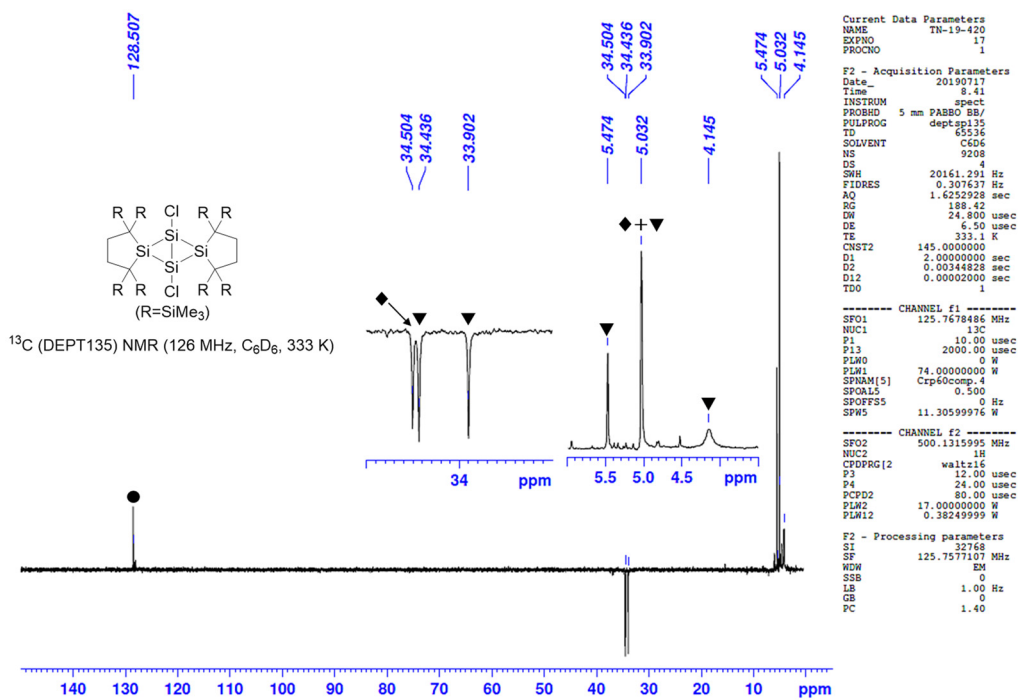

Figure S5.  $^{13}\text{C}$  (DEPT135) NMR spectrum of **4** in  $\text{C}_6\text{D}_6$  at 333 K ( $\bullet = \text{C}_6\text{D}_6$ ,  $\blacklozenge = 4$ ,  $\blacktriangledown = 6$ ).

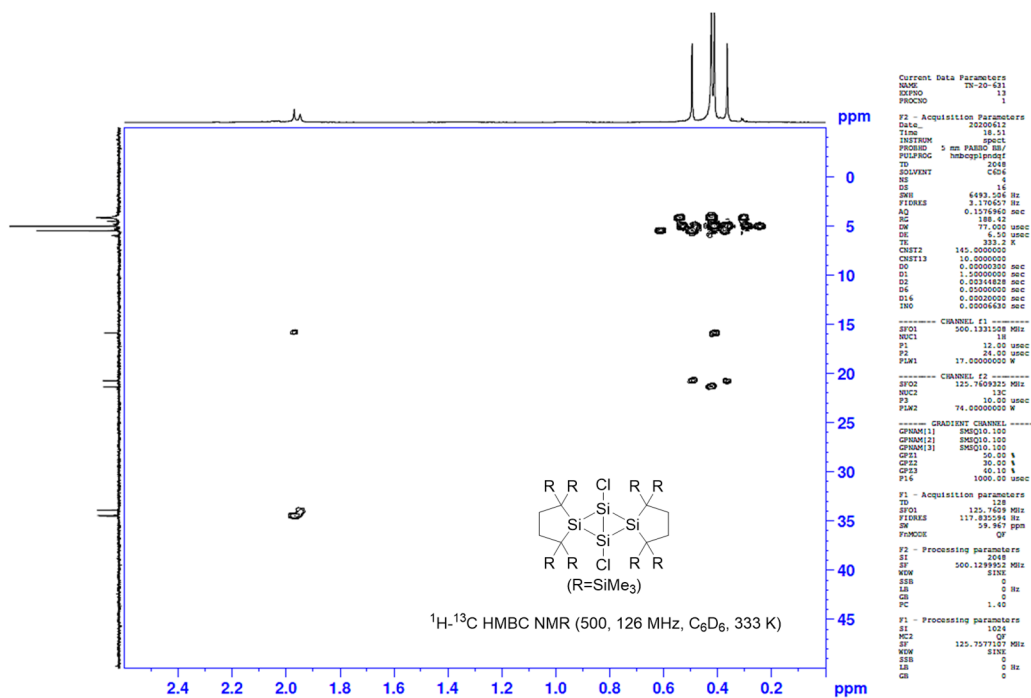

Figure S6.  $^1\text{H}$ - $^{13}\text{C}$  HMBC NMR spectrum of **4** in  $\text{C}_6\text{D}_6$  at 333 K.

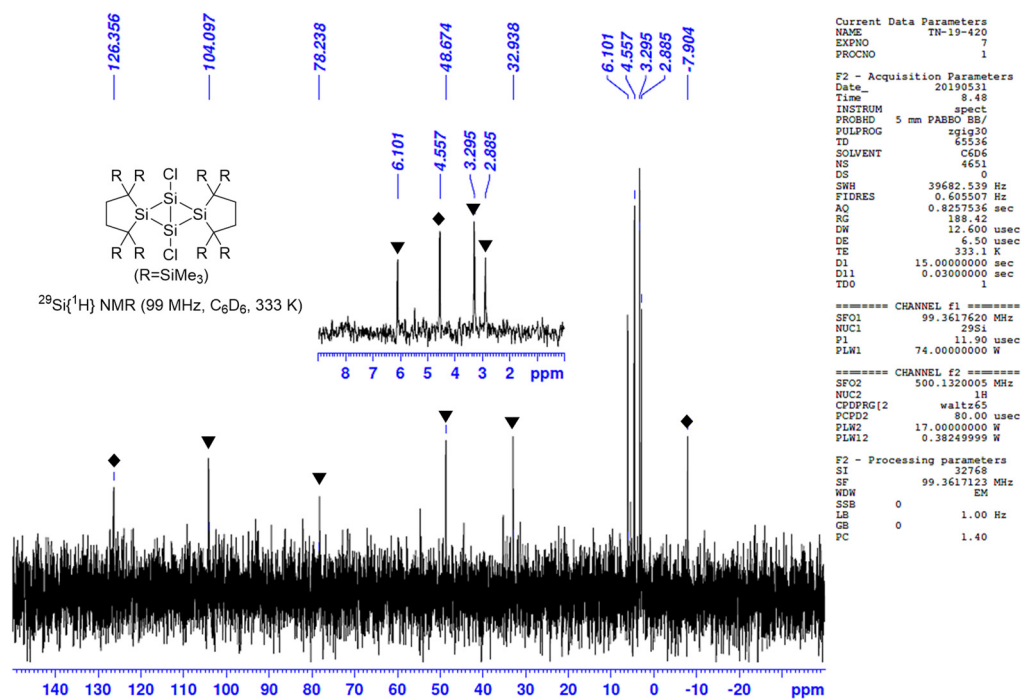

Figure S7.  $^{29}\text{Si}\{^1\text{H}\}$  NMR spectrum of **4** in  $\text{C}_6\text{D}_6$  at 333 K. ( $\blacklozenge = 4$ ,  $\blacktriangledown = 6$ ).

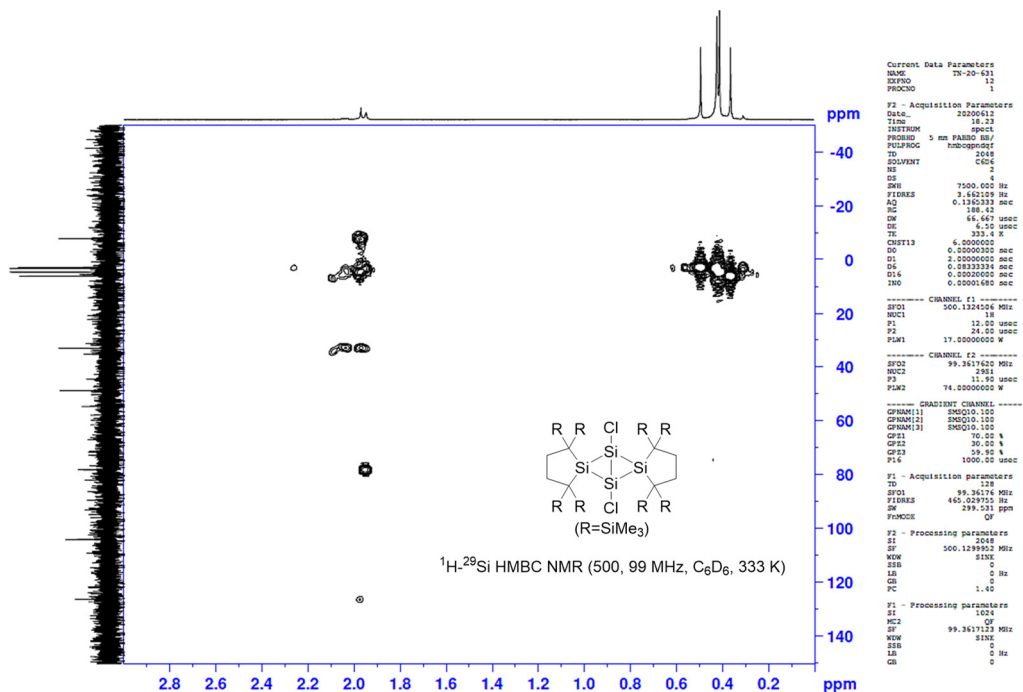

Figure S8.  $^1\text{H}$ - $^{29}\text{Si}$  HMBC NMR spectrum of **4** in  $\text{C}_6\text{D}_6$  at 333 K.

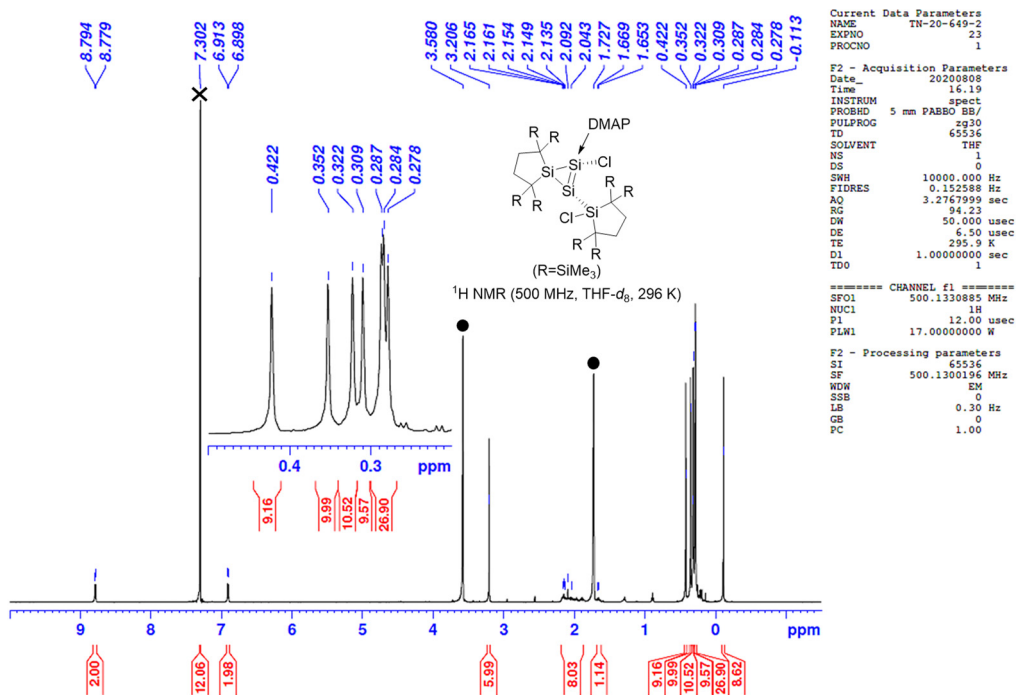

Figure S9.  $^1\text{H}$  NMR spectrum of  $7 \cdot (\text{benzene})_2$  in THF- $d_8$  at 296 K ( $\bullet$  = THF- $d_8$ ,  $\times$  = benzene).

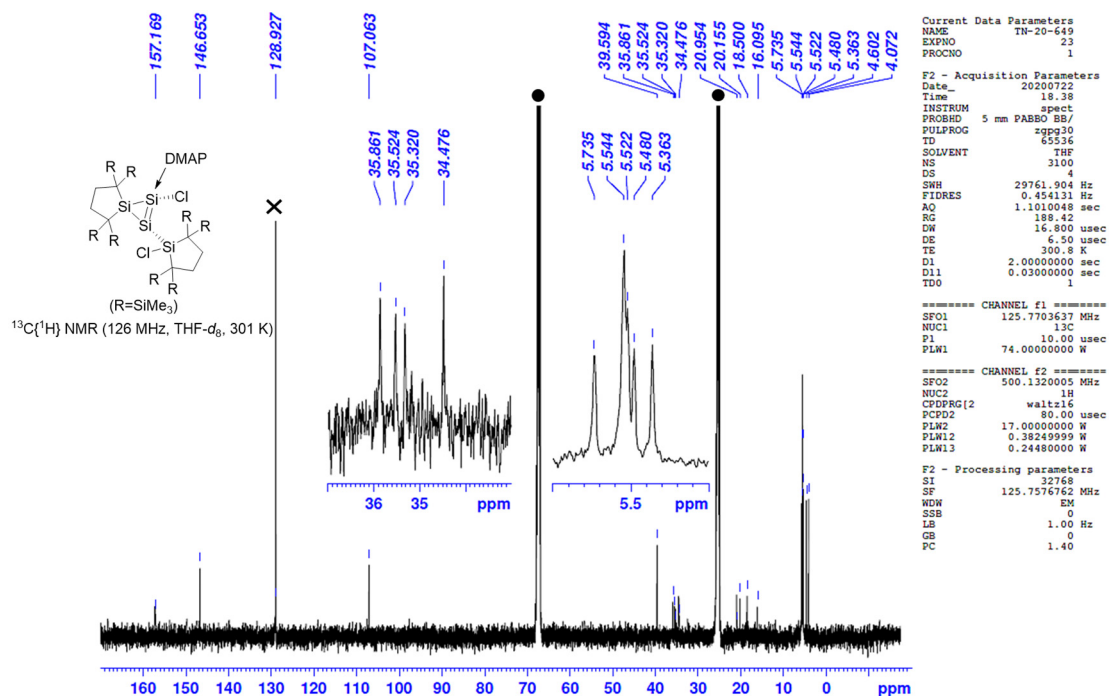

Figure S10.  $^{13}\text{C}\{^1\text{H}\}$  NMR spectrum of  $7 \cdot (\text{benzene})_2$  in THF- $d_8$  in 301 K ( $\bullet$  = THF- $d_8$ ,  $\times$  = benzene).

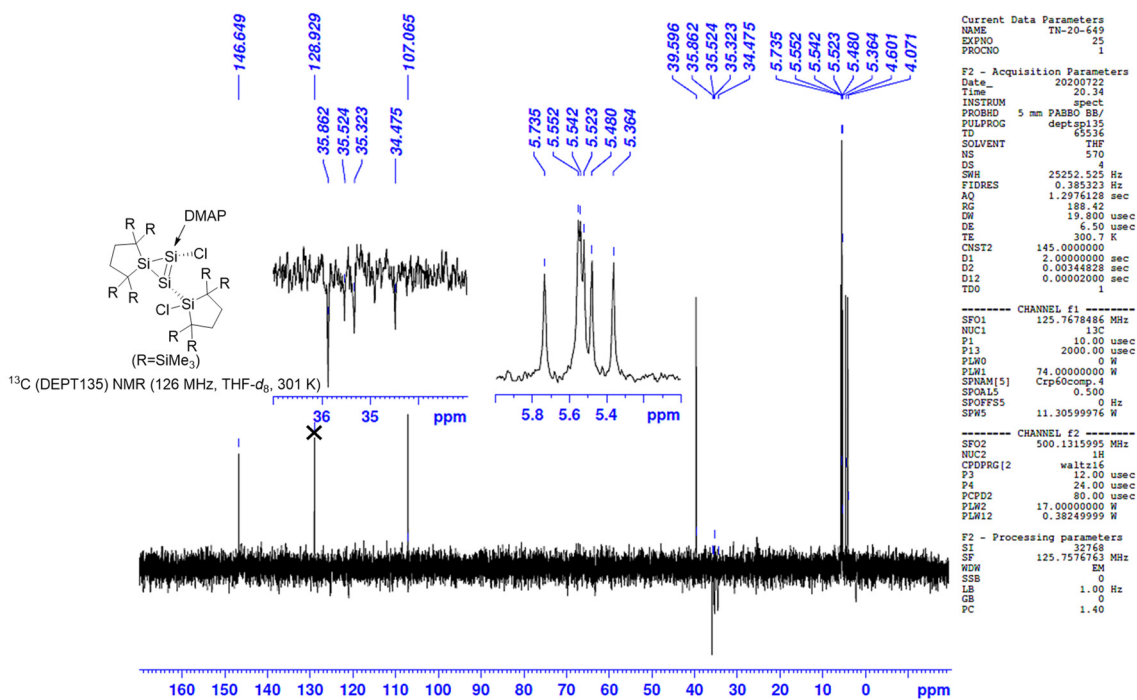

Figure S11. <sup>13</sup>C (DEPT135) NMR spectrum of 7-(benzene)<sub>2</sub> in THF-d<sub>8</sub> at 301 K (x = benzene).

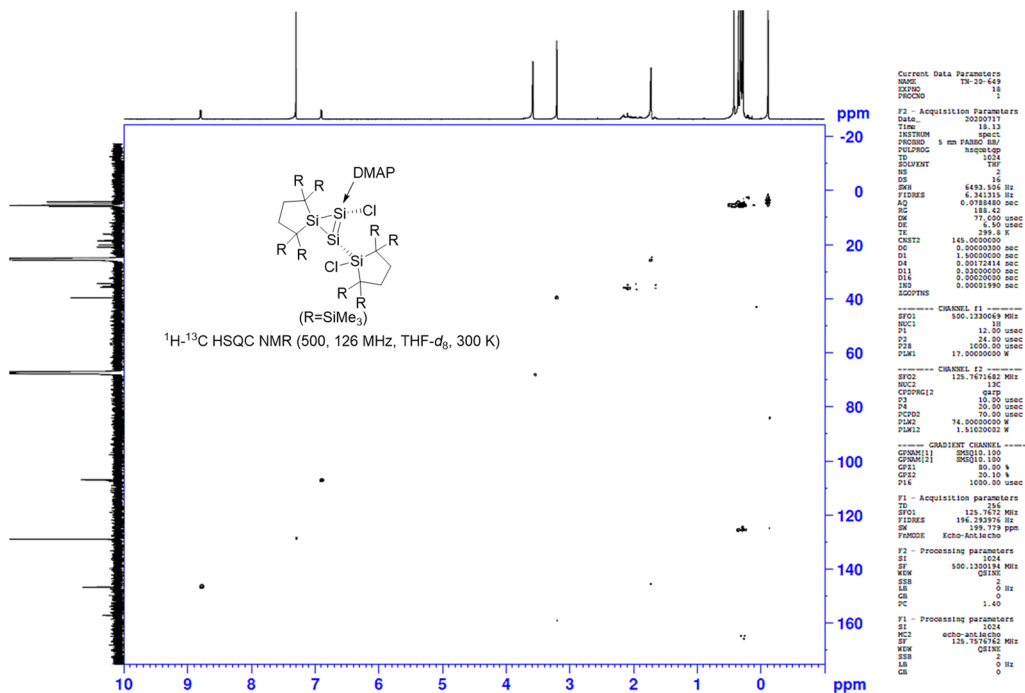

Figure S12. <sup>1</sup>H-<sup>13</sup>C HSQC NMR spectrum of 7-(benzene)<sub>2</sub> in THF-d<sub>8</sub> at 300 K.

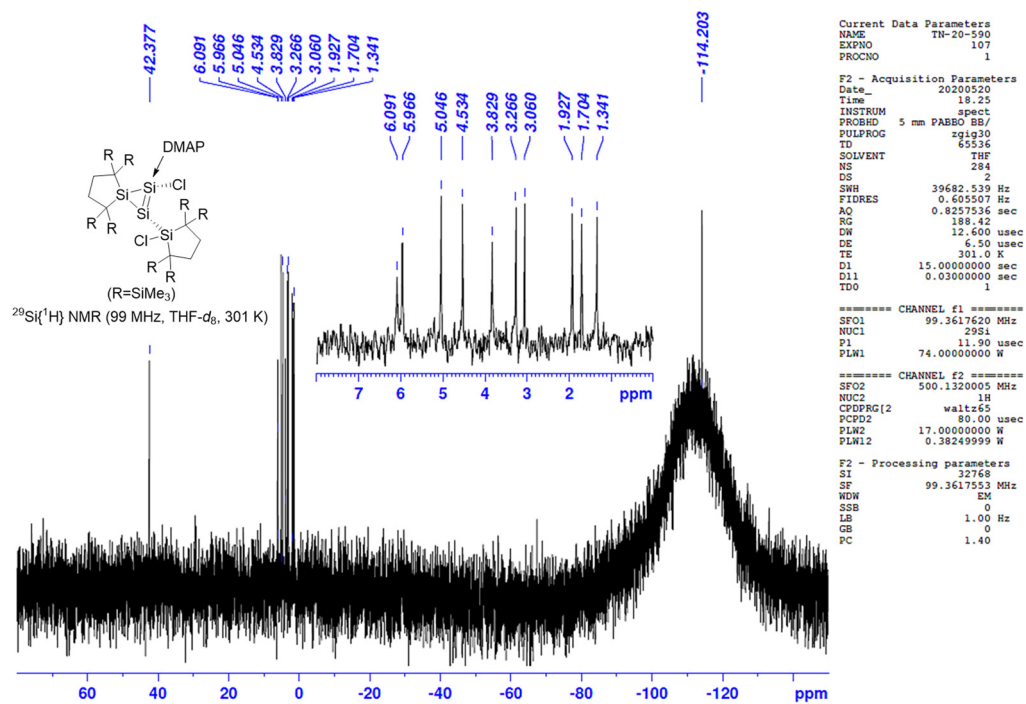

Figure S13.  $^{29}\text{Si}\{^1\text{H}\}$  NMR spectrum of **7**·(benzene)<sub>2</sub> in THF- $d_8$  at 301 K.

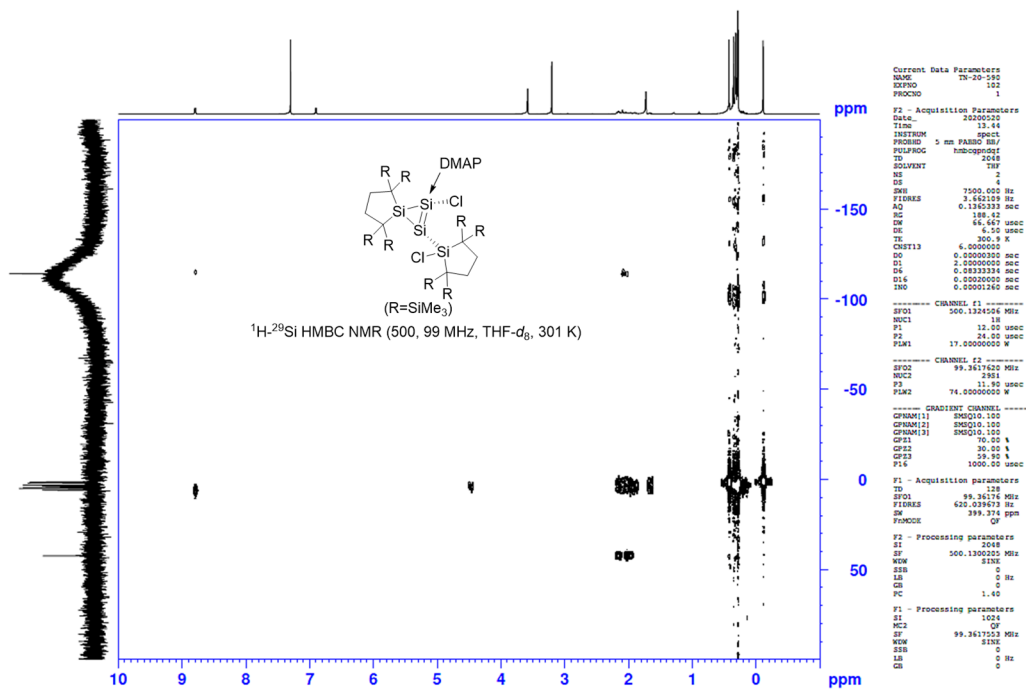

Figure S14.  $^1\text{H}$ - $^{29}\text{Si}$  HMBC NMR spectrum of **7**·(benzene)<sub>2</sub> in THF- $d_8$  at 301 K.



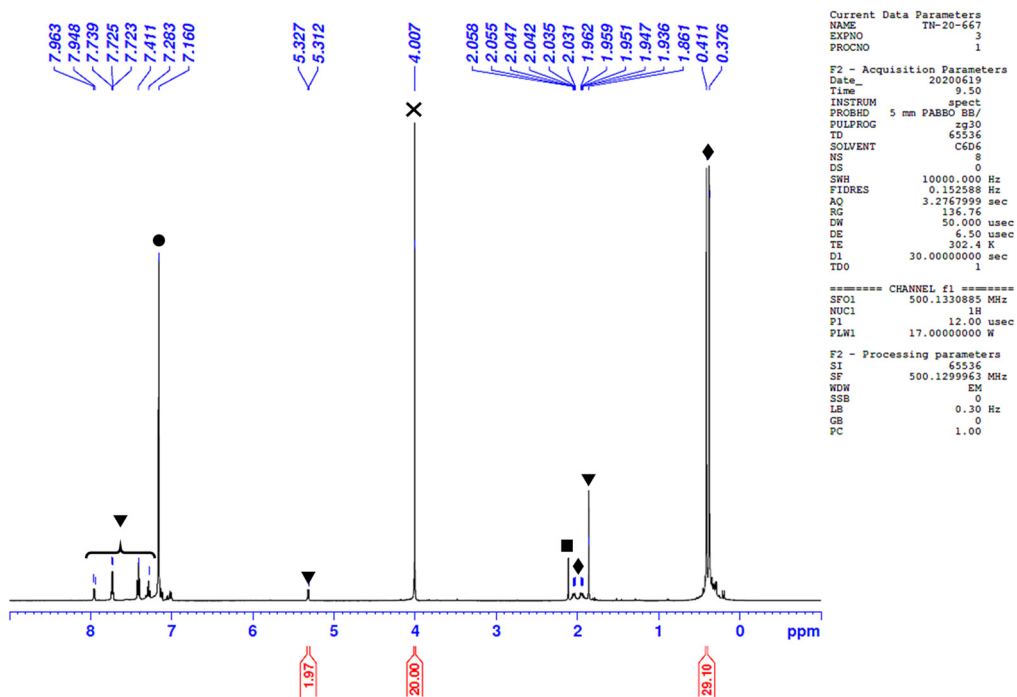

**Figure S15.**  $^1\text{H}$  NMR spectrum of the reaction mixture of **7** with  $\text{CCl}_4$  in the presence of  $\text{BPh}_3$  in  $\text{C}_6\text{D}_6$  at 302 K ( $\bullet$  =  $\text{C}_6\text{HD}_5$ ,  $\blacktriangledown$  =  $\text{BPh}_3\cdot\text{DMAP}$ ,  $\blacklozenge$  = **3**,  $\times$  = ferrocene,  $\blacksquare$  = toluene).

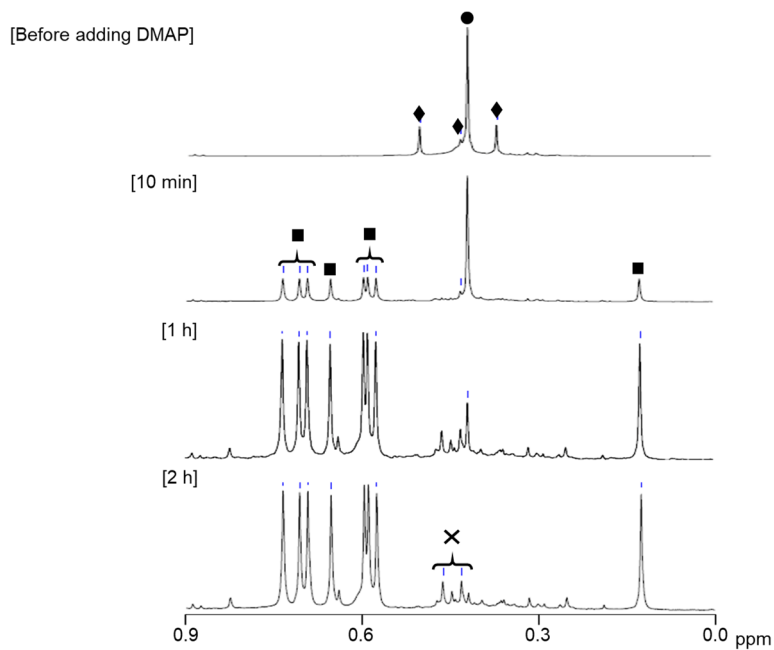

**Figure S16.**  $^1\text{H}$  NMR spectra (TMS region) of the reaction mixture of **4+6** with DMAP in  $\text{C}_6\text{D}_6$  at room temperature ( $\bullet$  = **4**,  $\blacklozenge$  = **6**,  $\blacksquare$  = **7**,  $\times$  = by products).

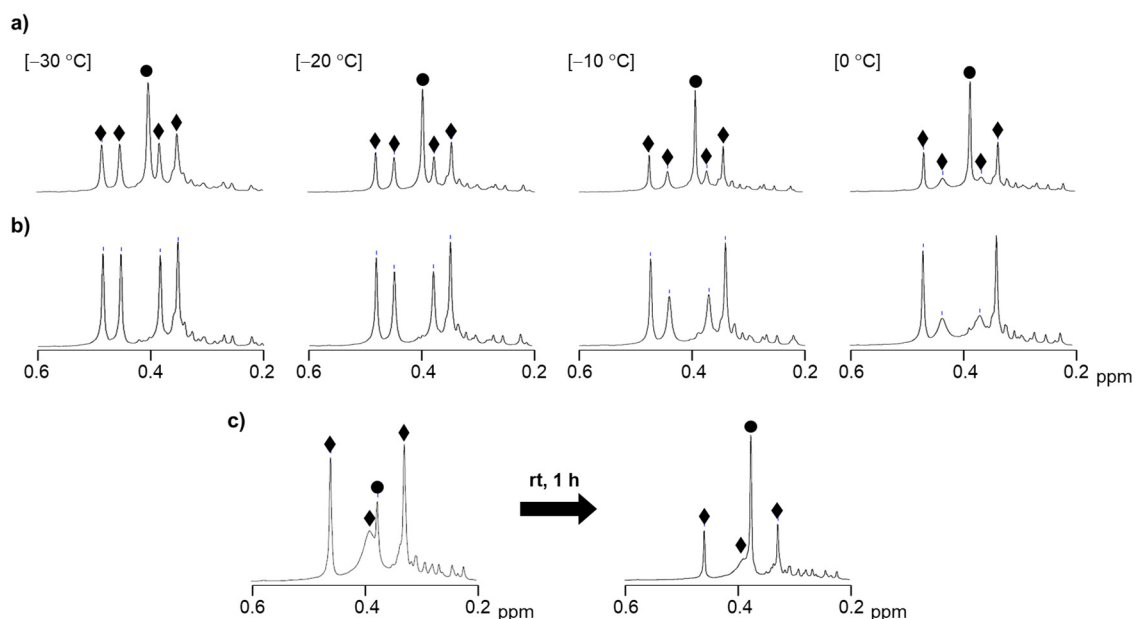

**Figure S17.**  $^1\text{H}$  NMR spectra (TMS region) of a) the equilibrium mixture of 4+6 and b) the reaction mixture of 7 with  $\text{BPh}_3$  in  $\text{toluene-}d_8$  at variable temperature. c)  $^1\text{H}$  NMR spectra (TMS region) of the reaction mixture of 7 with  $\text{BPh}_3$  (left: just after warming up, right: after 1 hour) in  $\text{toluene-}d_8$  at room temperature ( $\bullet = 4$ ,  $\blacklozenge = 6$ ).

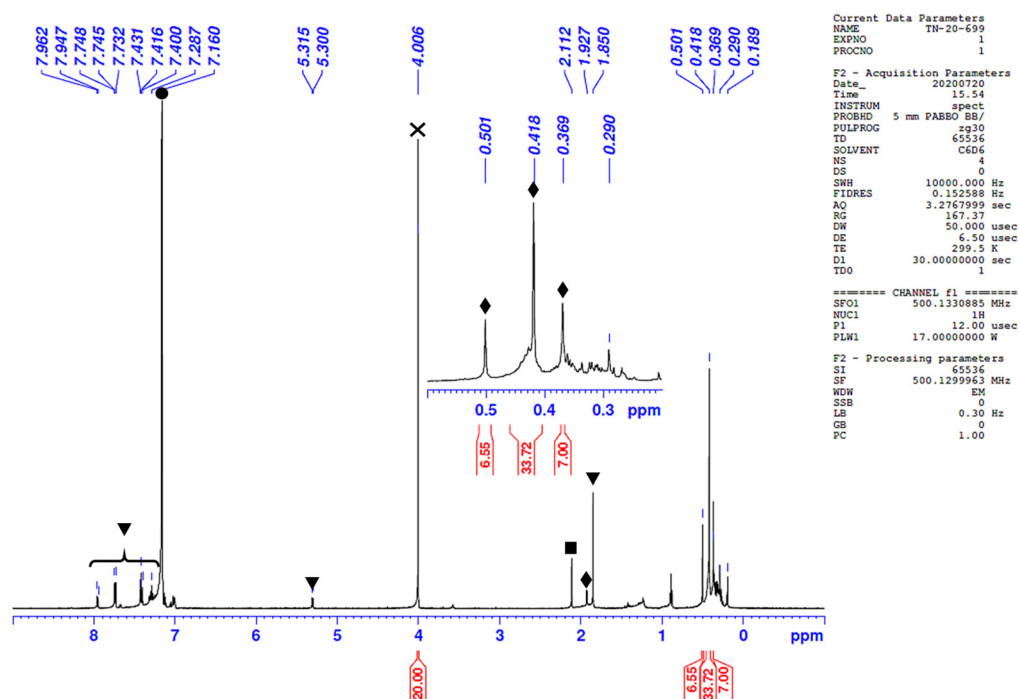

**Figure S18.**  $^1\text{H}$  NMR spectrum of the reaction mixture of 7 with  $\text{BPh}_3$  in  $\text{C}_6\text{D}_6$  at 300 K ( $\bullet = \text{C}_6\text{HD}_5$ ,  $\blacktriangledown = \text{BPh}_3 \cdot \text{DMAP}$ ,  $\blacklozenge = 4+6$ ,  $\times = \text{ferrocene}$ ,  $\blacksquare = \text{toluene}$ ).

## 2. X-Ray diffraction analysis

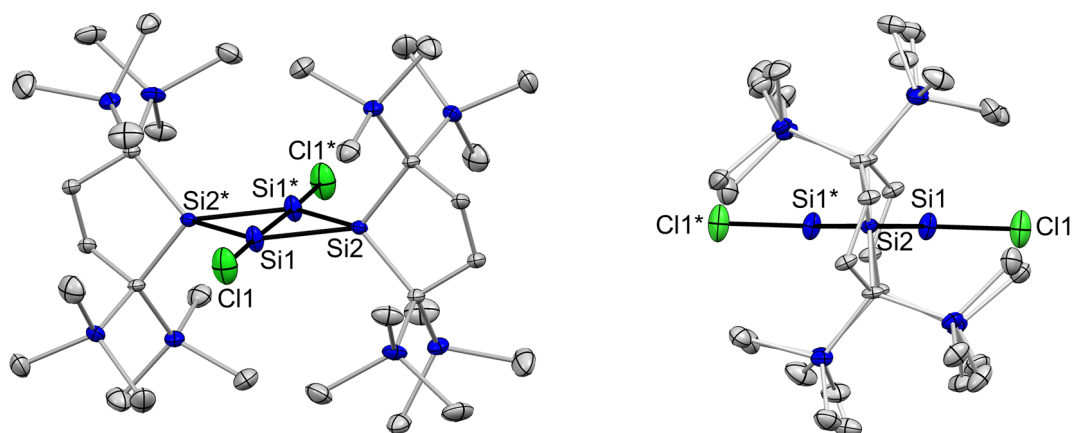

**Figure S19.** ORTEP drawings of **4**. Thermal ellipsoids are shown at the 50% probability level.

Hydrogen atoms were omitted for clarity.

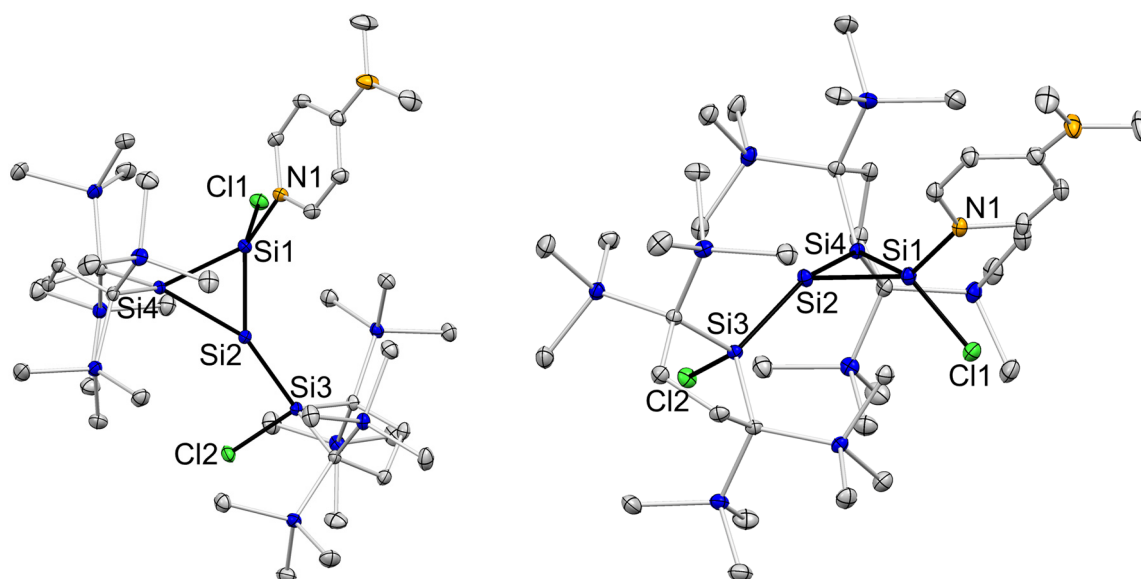

**Figure S20.** ORTEP drawings of **7**. Thermal ellipsoids are shown at the 50% probability level.

Hydrogen atoms were omitted for clarity.

### 3. UV-vis absorption spectrum

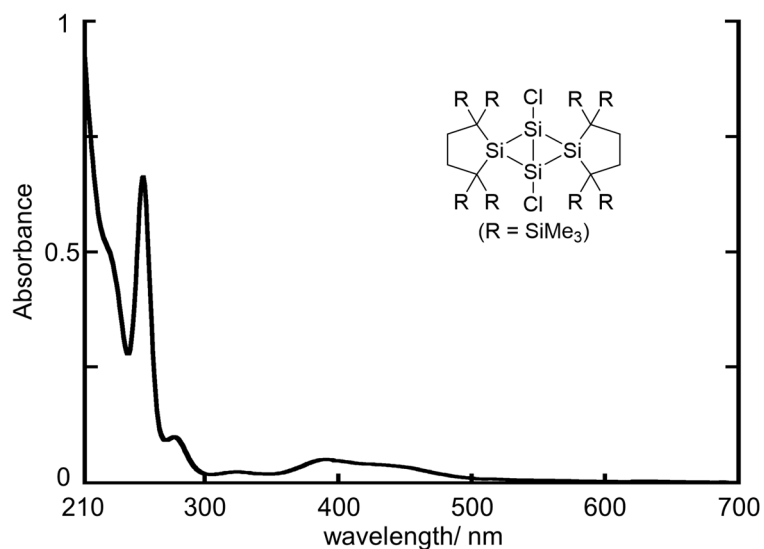

**Figure S21.** UV-Vis absorption spectrum of the equilibrium mixture of **4** and **6** in hexane at room temperature.

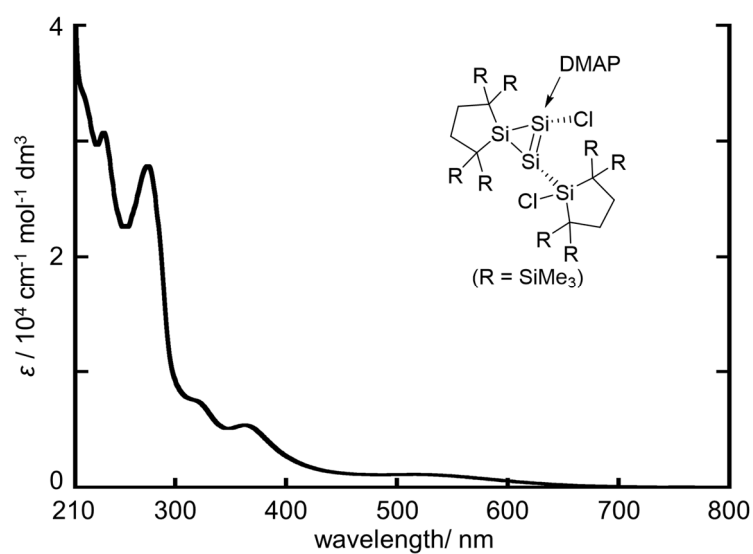

**Figure S22.** UV-Vis absorption spectrum of **7**·(benzene)<sub>2</sub> dissolved in hexane at room temperature.

**Table S1.** UV-vis Absorption Bands of **7**·(benzene)<sub>2</sub>

| Absorption maximum / nm | $\epsilon / 10^4 \text{ cm}^{-1} \text{ mol}^{-1} \text{ dm}^3$ |
|-------------------------|-----------------------------------------------------------------|
| 519                     | 1,100                                                           |
| 362                     | 5,400                                                           |
| 315 sh <sup>a)</sup>    | 7,600                                                           |
| 275 <sup>b)</sup>       | 28,000                                                          |
| 236 <sup>b)</sup>       | 31,000                                                          |

a) sh = shoulder, b) the absorption bands of benzene involved the crystals of **7** should be overlapped.

#### 4. Computational study

The atomic coordinates and energies of all equilibrium and transition structures are summarized in the file named “optimized\_structures.xyz”. The selected structural parameters of **4**<sub>opt</sub>, **4'**<sub>opt</sub>, **4''**<sub>opt</sub>, and **7**<sub>opt</sub> are summarized in Table S2 and S3. Frontier Kohn-Sham orbitals and their energy levels of **4**<sub>opt</sub> were shown in Figure S23. Isotropic chemical shielding tensors were calculated at the GIAO/M06L/6-311+G(2df,p) level of theory (Table S4 and S5). Absolute isotropic shielding tensors of <sup>29</sup>Si nucleus in tetramethylsilane were calculated to be 361.4 (GIAO/M06L/6-311+G(2df,p)). Excitation energies and oscillator strengths of **4**<sub>opt</sub> and **6**<sub>opt</sub> were calculated at the B3LYP/6-311G(d) level of theory (Tables S6 and S7). A possible reaction route between **4**<sub>opt</sub> and **6**<sub>opt</sub> calculated at the B3LYP-D3/B1 (basis B1: 6-311G(d) [core Si4Cl2], 6-31G(d) [carbon atoms in silacyclopentane rings], 3-21G\* [others]) were shown in Figure S25.

**Table S2.** Selected Structural Parameters of **4**, **4<sub>opt</sub>**, **4'<sub>opt</sub>** and **4''<sub>opt</sub>**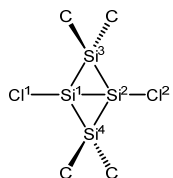

| Cpd                      | distance/Å                       |                                  |                                  |                                  |                                  | angle/°                          |                                  |                                                   |                                                   |                                                   |                                                   |                                                                    | $E^{b,c}$<br>[ΔG] <sup>b,d</sup> | $\Delta E^{c,e}$<br>[ΔΔG] <sup>d,e</sup> | note<br>(job name) |  |
|--------------------------|----------------------------------|----------------------------------|----------------------------------|----------------------------------|----------------------------------|----------------------------------|----------------------------------|---------------------------------------------------|---------------------------------------------------|---------------------------------------------------|---------------------------------------------------|--------------------------------------------------------------------|----------------------------------|------------------------------------------|--------------------|--|
|                          | Si <sup>1</sup> -Si <sup>2</sup> | Si <sup>1</sup> -Si <sup>3</sup> | Si <sup>1</sup> -Si <sup>4</sup> | Si <sup>2</sup> -Si <sup>3</sup> | Si <sup>2</sup> -Si <sup>4</sup> | Si <sup>1</sup> -Cl <sup>1</sup> | Si <sup>2</sup> -Cl <sup>2</sup> | Cl <sup>1</sup> -Si <sup>1</sup> -Si <sup>2</sup> | Cl <sup>2</sup> -Si <sup>2</sup> -Si <sup>1</sup> | Si <sup>1</sup> -Si <sup>3</sup> -Si <sup>2</sup> | Si <sup>1</sup> -Si <sup>4</sup> -Si <sup>2</sup> | Si <sup>3</sup> -Si <sup>1</sup> -Si <sup>2</sup> -Si <sup>4</sup> |                                  |                                          |                    |  |
| XRD                      |                                  |                                  |                                  |                                  |                                  |                                  |                                  |                                                   |                                                   |                                                   |                                                   |                                                                    |                                  |                                          |                    |  |
| <b>4</b>                 | 2.581(2)                         | 2.3249(17)                       | 2.3361(17)                       | 2.3361(17)                       | 2.3249(17)                       | 2.0690(18)                       | 2.0690(18)                       | 178.27(11)                                        | 178.27(11)                                        | 67.26(6)                                          | 67.26(6)                                          | 180.00                                                             | -                                | -                                        | tn08a              |  |
| DFT <sup>a</sup>         |                                  |                                  |                                  |                                  |                                  |                                  |                                  |                                                   |                                                   |                                                   |                                                   |                                                                    |                                  |                                          |                    |  |
| <b>4<sub>opt</sub></b>   | 2.58285                          | 2.31823                          | 2.33167                          | 2.33167                          | 2.31823                          | 2.10926                          | 2.10926                          | 178.572                                           | 178.572                                           | 67.485                                            | 67.485                                            | 180.000                                                            | -5662.014735                     | 0.0                                      | TN74a              |  |
| <b>4'<sub>opt</sub></b>  | 2.89287                          | 2.39590                          | 2.41124                          | 2.45983                          | 2.43874                          | 2.14902                          | 2.14000                          | 109.187                                           | 113.787                                           | 73.121                                            | 73.233                                            | -174.450                                                           | [-5662.116181]                   | [0.0]                                    | TN77_120           |  |
| <b>4''<sub>opt</sub></b> | 2.44338                          | 2.32745                          | 2.33875                          | 2.33875                          | 2.32745                          | 2.10637                          | 2.10637                          | 160.679                                           | 160.679                                           | 63.152                                            | 63.152                                            | -149.598                                                           | [-5662.115585]                   | [1.6]                                    | TN84a              |  |
|                          |                                  |                                  |                                  |                                  |                                  |                                  |                                  |                                                   |                                                   |                                                   |                                                   |                                                                    | [-5662.114172]                   | [5.3]                                    |                    |  |

a. optimized at the B3LYP-D3/6-311G(d) level of theory. b. in hartree. c. Zero-point vibrational energy corrections were included. d. at 298.15 K. e. in kJ mol<sup>-1</sup>.

**Table S3.** Selected Structural Parameters of **7<sub>opt</sub>**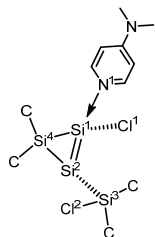

| Cpd                    | distance/Å                       |                                  |                                  |                                  |                                  | angle/°                          |                                 |                                                   |                                                   |                                                   | note<br>(job name) |  |
|------------------------|----------------------------------|----------------------------------|----------------------------------|----------------------------------|----------------------------------|----------------------------------|---------------------------------|---------------------------------------------------|---------------------------------------------------|---------------------------------------------------|--------------------|--|
|                        | Si <sup>1</sup> -Si <sup>2</sup> | Si <sup>1</sup> -Si <sup>4</sup> | Si <sup>2</sup> -Si <sup>3</sup> | Si <sup>2</sup> -Si <sup>4</sup> | Si <sup>1</sup> -Cl <sup>1</sup> | Si <sup>3</sup> -Cl <sup>2</sup> | Si <sup>1</sup> -N <sup>1</sup> | Si <sup>1</sup> -Si <sup>2</sup> -Si <sup>4</sup> | Si <sup>2</sup> -Si <sup>1</sup> -Si <sup>4</sup> | Si <sup>1</sup> -Si <sup>4</sup> -Si <sup>2</sup> |                    |  |
| XRD                    |                                  |                                  |                                  |                                  |                                  |                                  |                                 |                                                   |                                                   |                                                   |                    |  |
| <b>7</b>               | 2.2145(7)                        | 2.2986(7)                        | 2.3791(7)                        | 2.3893(7)                        | 2.1107(6)                        | 2.1317(6)                        | 1.8789(15)                      | 59.76(2)                                          | 63.90(2)                                          | 66.98(3)                                          | tn49a              |  |
| DFT <sup>a</sup>       |                                  |                                  |                                  |                                  |                                  |                                  |                                 |                                                   |                                                   |                                                   |                    |  |
| <b>7<sub>opt</sub></b> | 2.21522                          | 2.31830                          | 2.38969                          | 2.40381                          | 2.14769                          | 2.16048                          | 1.94002                         | 60.087                                            | 63.995                                            | 55.919                                            | TN89aa             |  |

a. optimized at the B3LYP-D3/6-311G(d) level of theory.

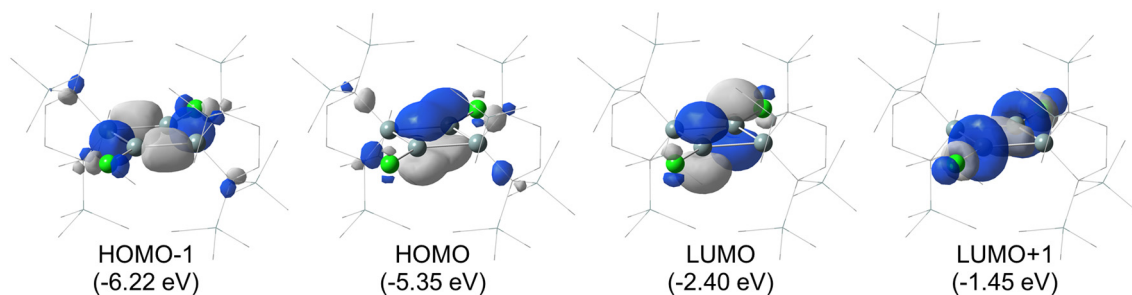

**Figure S23.** Frontier Kohn-Sham orbitals of **4<sub>opt</sub>** at the B3LYP-D3/6-311G(d) level of theory.

**Table S4.** Experimental and Theoretical Isotropic <sup>29</sup>Si Chemical Shifts of **4**, **4<sub>opt</sub>**, **4'<sub>opt</sub>** and **4''<sub>opt</sub>**

| Compound                               | SiMe <sub>3</sub>        | Si (bridge)   | Si (bridgehead) | note          |
|----------------------------------------|--------------------------|---------------|-----------------|---------------|
| <b>4<sup>a</sup></b>                   | 4.6                      | -7.9          | 126.4           | TN420_7       |
| <b>4<sub>opt</sub><sup>b,c</sup></b>   | 5.0 (356.4) <sup>d</sup> | -17.1 (378.5) | 150.2 (211.2)   | nmr2_TN74a    |
| <b>4'<sub>opt</sub><sup>b,c</sup></b>  | 5.3 (356.1) <sup>d</sup> | 139.5 (221.9) | -37.1 (398.3)   | nmr2_TN77_120 |
|                                        |                          | 137.1 (224.3) | -49.9 (411.3)   |               |
| <b>4''<sub>opt</sub><sup>b,c</sup></b> | 4.8 (356.6) <sup>d</sup> | -25.1 (386.5) | 86.5 (274.8)    | nmr_TN84a     |

a. Experimental <sup>29</sup>Si Chemical Shifts of **4** in benzene-*d*<sub>6</sub> at 333 K. b. GIAO/M06L/6-311+G(2df,p) level of theory. Absolute chemical shift for tetramethylsilane = 361.4. c. the absolute chemical shift is shown in the parentheses. d. average values.

**Table S5.** Experimental and Theoretical Isotropic <sup>29</sup>Si Chemical Shifts of **6<sub>opt</sub>**

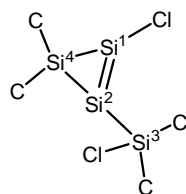

|                            | SiMe <sub>3</sub>           | Si <sup>2</sup> =Si <sup>1</sup> -Cl | Si <sup>2</sup> =Si <sup>1</sup> -Cl | Si <sup>4</sup> (Si <sub>3</sub> ring) | Si <sup>3</sup> (chlorosilyl) | Note       |
|----------------------------|-----------------------------|--------------------------------------|--------------------------------------|----------------------------------------|-------------------------------|------------|
| Experimental <sup>a</sup>  | 2.9, 3.3,<br>6.1            | 104.1                                | 48.7                                 | 78.2                                   | 32.9                          | TN420_7    |
| Theoretical <sup>b,c</sup> | 4.2<br>(357.2) <sup>d</sup> | 97.0<br>(264.4)                      | 49.4<br>(311.9)                      | 75.4<br>(286.0)                        | 38.1<br>(323.3)               | nmr2_TN82a |

a. Experimental <sup>29</sup>Si Chemical Shifts of **6** in benzene-*d*<sub>6</sub> at 333 K. b. GIAO/M06L/6-311+G(2df,p) level of theory. Absolute chemical shift for tetramethylsilane = 361.4. c. the absolute chemical shift is shown in the parentheses. d. average values.

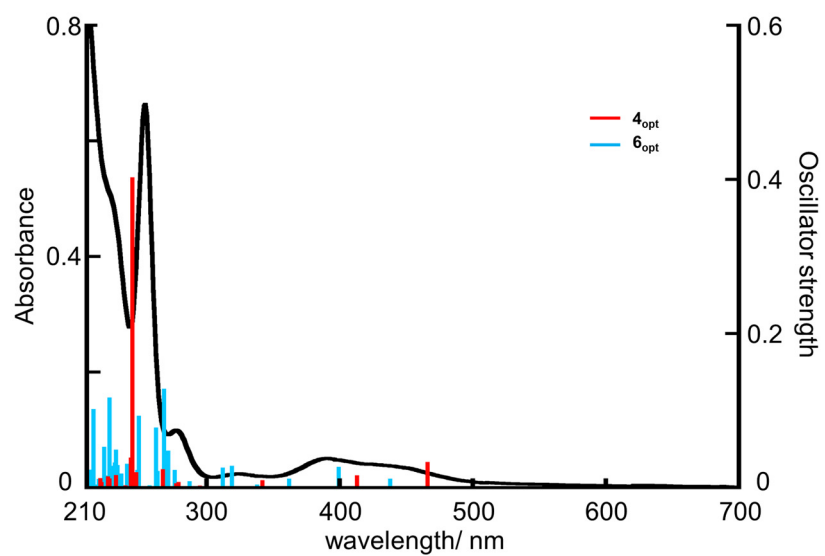

**Figure S24.** Experimental UV-vis absorption spectrum of the equilibrium mixture of **4** and **6** in hexane (black) and calculated band positions of **4**<sub>opt</sub> and **6**<sub>opt</sub> at the TD-B3LYP-D3/6-311G(d) level (red and blue).



**Table S6.** Transition Energy, Wavelength, and Oscillator Strengths of the Electronic Transition of **4<sub>opt</sub>**  
(The 237<sup>th</sup> orbital is highest occupied orbital shown in Figure S23)

|                                                                                   |     |            |           |           |          |                               |     |            |           |           |          |
|-----------------------------------------------------------------------------------|-----|------------|-----------|-----------|----------|-------------------------------|-----|------------|-----------|-----------|----------|
| Excited State<br><S**2>=0.000                                                     | 1:  | Singlet-AU | 2.6596 eV | 466.17 nm | f=0.0332 | Excited State<br><S**2>=0.000 | 16: | Singlet-AU | 4.9319 eV | 251.39 nm | f=0.0005 |
| 237 -> 238                                                                        |     | 0.67896    |           |           |          | 228 -> 238                    |     | 0.68938    |           |           |          |
| 237 -> 239                                                                        |     | -0.17174   |           |           |          |                               |     |            |           |           |          |
| This state for optimization and/or second-order correction.                       |     |            |           |           |          |                               |     |            |           |           |          |
| Total Energy, E(TD-HF/TD-KS) = -5662.97431013                                     |     |            |           |           |          |                               |     |            |           |           |          |
| Copying the excited state density for this state as the 1-particle RhoCI density. |     |            |           |           |          |                               |     |            |           |           |          |
| Excited State<br><S**2>=0.000                                                     | 2:  | Singlet-AG | 2.8801 eV | 430.48 nm | f=0.0000 | Excited State<br><S**2>=0.000 | 17: | Singlet-AG | 4.9464 eV | 250.65 nm | f=0.0000 |
| 236 -> 238                                                                        |     | 0.70504    |           |           |          | 226 -> 238                    |     | -0.10228   |           |           |          |
|                                                                                   |     |            |           |           |          | 227 -> 238                    |     | 0.68694    |           |           |          |
| Excited State<br><S**2>=0.000                                                     | 3:  | Singlet-AU | 3.0056 eV | 412.51 nm | f=0.0162 | Excited State<br><S**2>=0.000 | 18: | Singlet-AU | 5.0255 eV | 246.71 nm | f=0.0202 |
| 237 -> 238                                                                        |     | 0.16949    |           |           |          | 223 -> 238                    |     | 0.40022    |           |           |          |
| 237 -> 239                                                                        |     | 0.67597    |           |           |          | 225 -> 238                    |     | 0.52671    |           |           |          |
|                                                                                   |     |            |           |           |          | 237 -> 242                    |     | 0.11984    |           |           |          |
| Excited State<br><S**2>=0.000                                                     | 4:  | Singlet-AU | 3.6254 eV | 341.99 nm | f=0.0096 | Excited State<br><S**2>=0.000 | 19: | Singlet-AG | 5.0351 eV | 246.24 nm | f=0.0000 |
| 237 -> 240                                                                        |     | 0.68769    |           |           |          | 224 -> 238                    |     | -0.18600   |           |           |          |
|                                                                                   |     |            |           |           |          | 226 -> 238                    |     | 0.66703    |           |           |          |
| Excited State<br><S**2>=0.000                                                     | 5:  | Singlet-AG | 3.7152 eV | 333.72 nm | f=0.0000 | Excited State<br><S**2>=0.000 | 20: | Singlet-AU | 5.0715 eV | 244.47 nm | f=0.4028 |
| 237 -> 241                                                                        |     | 0.70481    |           |           |          | 225 -> 238                    |     | -0.25689   |           |           |          |
|                                                                                   |     |            |           |           |          | 230 -> 240                    |     | -0.16019   |           |           |          |
| Excited State<br><S**2>=0.000                                                     | 6:  | Singlet-AG | 3.8746 eV | 319.99 nm | f=0.0000 | 236 -> 241                    |     | 0.36213    |           |           |          |
| 236 -> 239                                                                        |     | 0.69880    |           |           |          | 237 -> 242                    |     | 0.48343    |           |           |          |
| Excited State<br><S**2>=0.000                                                     | 7:  | Singlet-AG | 4.1861 eV | 296.18 nm | f=0.0000 | Excited State<br><S**2>=0.000 | 21: | Singlet-AU | 5.0853 eV | 243.81 nm | f=0.0392 |
| 233 -> 238                                                                        |     | -0.11200   |           |           |          | 219 -> 238                    |     | 0.15226    |           |           |          |
| 235 -> 238                                                                        |     | 0.69584    |           |           |          | 223 -> 238                    |     | 0.50704    |           |           |          |
|                                                                                   |     |            |           |           |          | 225 -> 238                    |     | -0.37875   |           |           |          |
| Excited State<br><S**2>=0.000                                                     | 8:  | Singlet-AU | 4.1991 eV | 295.26 nm | f=0.0026 | 236 -> 241                    |     | -0.11926   |           |           |          |
| 234 -> 238                                                                        |     | 0.70535    |           |           |          | 237 -> 242                    |     | -0.16915   |           |           |          |
| Excited State<br><S**2>=0.000                                                     | 9:  | Singlet-AG | 4.2735 eV | 290.12 nm | f=0.0000 | Excited State<br><S**2>=0.000 | 22: | Singlet-AG | 5.1078 eV | 242.74 nm | f=0.0000 |
| 233 -> 238                                                                        |     | 0.68739    |           |           |          | 218 -> 238                    |     | -0.10510   |           |           |          |
| 235 -> 238                                                                        |     | 0.11840    |           |           |          | 221 -> 238                    |     | -0.11859   |           |           |          |
| 236 -> 240                                                                        |     | -0.10203   |           |           |          | 224 -> 238                    |     | 0.66031    |           |           |          |
|                                                                                   |     |            |           |           |          | 226 -> 238                    |     | 0.16395    |           |           |          |
| Excited State<br><S**2>=0.000                                                     | 10: | Singlet-AU | 4.3196 eV | 287.03 nm | f=0.0013 | Excited State<br><S**2>=0.000 | 23: | Singlet-AG | 5.1488 eV | 240.80 nm | f=0.0000 |
| 230 -> 238                                                                        |     | -0.35899   |           |           |          | 235 -> 239                    |     | 0.69109    |           |           |          |
| 231 -> 238                                                                        |     | 0.19538    |           |           |          |                               |     |            |           |           |          |
| 232 -> 238                                                                        |     | 0.56102    |           |           |          | Excited State<br><S**2>=0.000 | 24: | Singlet-AU | 5.1605 eV | 240.26 nm | f=0.0005 |
|                                                                                   |     |            |           |           |          | 219 -> 238                    |     | -0.10107   |           |           |          |
| Excited State<br><S**2>=0.000                                                     | 11: | Singlet-AU | 4.4516 eV | 278.52 nm | f=0.0074 | 234 -> 239                    |     | 0.69475    |           |           |          |
| 230 -> 238                                                                        |     | -0.30886   |           |           |          | Excited State<br><S**2>=0.000 | 25: | Singlet-AG | 5.1750 eV | 239.58 nm | f=0.0000 |
| 231 -> 238                                                                        |     | 0.49899    |           |           |          | 218 -> 238                    |     | -0.19745   |           |           |          |
| 232 -> 238                                                                        |     | -0.37371   |           |           |          | 220 -> 238                    |     | -0.16010   |           |           |          |
|                                                                                   |     |            |           |           |          | 221 -> 238                    |     | 0.64258    |           |           |          |
| Excited State<br><S**2>=0.000                                                     | 12: | Singlet-AU | 4.4717 eV | 277.27 nm | f=0.0059 | 226 -> 238                    |     | 0.12372    |           |           |          |
| 230 -> 238                                                                        |     | 0.50949    |           |           |          |                               |     |            |           |           |          |
| 231 -> 238                                                                        |     | 0.44481    |           |           |          | Excited State<br><S**2>=0.000 | 26: | Singlet-AU | 5.1898 eV | 238.90 nm | f=0.0031 |
| 232 -> 238                                                                        |     | 0.17234    |           |           |          | 219 -> 238                    |     | 0.56210    |           |           |          |
|                                                                                   |     |            |           |           |          | 222 -> 238                    |     | -0.37669   |           |           |          |
| Excited State<br><S**2>=0.000                                                     | 13: | Singlet-AG | 4.5559 eV | 272.14 nm | f=0.0000 | Excited State<br><S**2>=0.000 | 27: | Singlet-AU | 5.1938 eV | 238.72 nm | f=0.0022 |
| 229 -> 238                                                                        |     | 0.10870    |           |           |          | 219 -> 238                    |     | 0.33384    |           |           |          |
| 233 -> 238                                                                        |     | 0.10925    |           |           |          | 222 -> 238                    |     | 0.56757    |           |           |          |
| 236 -> 240                                                                        |     | 0.67874    |           |           |          | 223 -> 238                    |     | -0.20751   |           |           |          |
|                                                                                   |     |            |           |           |          |                               |     |            |           |           |          |
| Excited State<br><S**2>=0.000                                                     | 14: | Singlet-AU | 4.6516 eV | 266.54 nm | f=0.0240 | Excited State<br><S**2>=0.000 | 28: | Singlet-AG | 5.2111 eV | 237.93 nm | f=0.0000 |
| 236 -> 241                                                                        |     | 0.55902    |           |           |          | 218 -> 238                    |     | 0.35523    |           |           |          |
| 237 -> 242                                                                        |     | -0.42495   |           |           |          | 220 -> 238                    |     | 0.52265    |           |           |          |
|                                                                                   |     |            |           |           |          | 221 -> 238                    |     | 0.23219    |           |           |          |
| Excited State<br><S**2>=0.000                                                     | 15: | Singlet-AG | 4.6548 eV | 266.36 nm | f=0.0000 | 233 -> 239                    |     | 0.10324    |           |           |          |
| 229 -> 238                                                                        |     | 0.69462    |           |           |          |                               |     |            |           |           |          |
| 236 -> 240                                                                        |     | -0.11101   |           |           |          |                               |     |            |           |           |          |

|                               |     |            |           |           |          |                          |                     |           |           |          |
|-------------------------------|-----|------------|-----------|-----------|----------|--------------------------|---------------------|-----------|-----------|----------|
| Excited State<br><S**2>=0.000 | 29: | Singlet-AG | 5.2177 eV | 237.62 nm | f=0.0000 | 232 -> 239<br>237 -> 243 | 0.24274<br>-0.32682 |           |           |          |
| 220 -> 238                    |     | -0.12864   |           |           |          |                          |                     |           |           |          |
| 233 -> 239                    |     | 0.42332    |           |           |          | Excited State 39:        | Singlet-AU          | 5.5349 eV | 224.00 nm | f=0.0018 |
| 235 -> 239                    |     | 0.13669    |           |           |          | <S**2>=0.000             |                     |           |           |          |
| 237 -> 244                    |     | -0.39387   |           |           |          | 214 -> 238               |                     | 0.63465   |           |          |
| 237 -> 245                    |     | -0.29668   |           |           |          | 219 -> 238               |                     | -0.10541  |           |          |
| 237 -> 246                    |     | -0.16483   |           |           |          | 237 -> 247               |                     | -0.22362  |           |          |
| Excited State<br><S**2>=0.000 | 30: | Singlet-AU | 5.2547 eV | 235.95 nm | f=0.0003 | Excited State 40:        | Singlet-AG          | 5.5714 eV | 222.54 nm | f=0.0000 |
| 216 -> 238                    |     | 0.50300    |           |           |          | <S**2>=0.000             |                     |           |           |          |
| 217 -> 238                    |     | -0.45883   |           |           |          | 237 -> 244               |                     | -0.44605  |           |          |
|                               |     |            |           |           |          | 237 -> 245               |                     | 0.46699   |           |          |
|                               |     |            |           |           |          | 237 -> 246               |                     | 0.22863   |           |          |
| Excited State<br><S**2>=0.000 | 31: | Singlet-AG | 5.2555 eV | 235.91 nm | f=0.0000 | 237 -> 251               |                     | -0.11452  |           |          |
| 218 -> 238                    |     | 0.48456    |           |           |          | Excited State 41:        | Singlet-AG          | 5.5938 eV | 221.65 nm | f=0.0000 |
| 220 -> 238                    |     | -0.35848   |           |           |          | <S**2>=0.000             |                     |           |           |          |
| 233 -> 239                    |     | 0.26227    |           |           |          | 229 -> 239               |                     | -0.20244  |           |          |
| 237 -> 244                    |     | 0.17618    |           |           |          | 235 -> 240               |                     | 0.40339   |           |          |
| 237 -> 245                    |     | 0.12631    |           |           |          | 236 -> 242               |                     | 0.52537   |           |          |
| Excited State<br><S**2>=0.000 | 32: | Singlet-AG | 5.2592 eV | 235.75 nm | f=0.0000 | Excited State 42:        | Singlet-AU          | 5.6071 eV | 221.12 nm | f=0.0073 |
| 218 -> 238                    |     | -0.27171   |           |           |          | <S**2>=0.000             |                     |           |           |          |
| 220 -> 238                    |     | 0.20680    |           |           |          | 214 -> 238               |                     | 0.20388   |           |          |
| 233 -> 239                    |     | 0.47753    |           |           |          | 234 -> 240               |                     | 0.39718   |           |          |
| 237 -> 244                    |     | 0.29746    |           |           |          | 237 -> 247               |                     | 0.49449   |           |          |
| 237 -> 245                    |     | 0.20868    |           |           |          | 237 -> 250               |                     | 0.12358   |           |          |
| 237 -> 246                    |     | 0.11740    |           |           |          | Excited State 43:        | Singlet-AG          | 5.6117 eV | 220.94 nm | f=0.0000 |
| Excited State<br><S**2>=0.000 | 33: | Singlet-AU | 5.3132 eV | 233.35 nm | f=0.0009 | <S**2>=0.000             |                     |           |           |          |
| 216 -> 238                    |     | 0.45422    |           |           |          | 229 -> 239               |                     | 0.66507   |           |          |
| 217 -> 238                    |     | 0.51970    |           |           |          | 235 -> 240               |                     | 0.16996   |           |          |
|                               |     |            |           |           |          | 236 -> 242               |                     | 0.12094   |           |          |
| Excited State<br><S**2>=0.000 | 34: | Singlet-AU | 5.3368 eV | 232.32 nm | f=0.0165 | Excited State 44:        | Singlet-AU          | 5.6269 eV | 220.34 nm | f=0.0124 |
| 230 -> 239                    |     | -0.28837   |           |           |          | <S**2>=0.000             |                     |           |           |          |
| 232 -> 239                    |     | 0.62008    |           |           |          | 214 -> 238               |                     | -0.11933  |           |          |
|                               |     |            |           |           |          | 234 -> 240               |                     | 0.57325   |           |          |
|                               |     |            |           |           |          | 237 -> 247               |                     | -0.36564  |           |          |
| Excited State<br><S**2>=0.000 | 35: | Singlet-AU | 5.3509 eV | 231.71 nm | f=0.0007 | Excited State 45:        | Singlet-AG          | 5.6392 eV | 219.86 nm | f=0.0000 |
| 230 -> 239                    |     | -0.13789   |           |           |          | <S**2>=0.000             |                     |           |           |          |
| 231 -> 239                    |     | 0.67966    |           |           |          | 235 -> 240               |                     | 0.54533   |           |          |
|                               |     |            |           |           |          | 236 -> 242               |                     | -0.43265  |           |          |
| Excited State<br><S**2>=0.000 | 36: | Singlet-AU | 5.4520 eV | 227.41 nm | f=0.0120 | Excited State 46:        | Singlet-AG          | 5.6920 eV | 217.82 nm | f=0.0000 |
| 230 -> 239                    |     | 0.30533    |           |           |          | <S**2>=0.000             |                     |           |           |          |
| 232 -> 239                    |     | 0.13337    |           |           |          | 213 -> 238               |                     | 0.69754   |           |          |
| 237 -> 243                    |     | 0.60911    |           |           |          | Excited State 47:        | Singlet-AU          | 5.7024 eV | 217.43 nm | f=0.0012 |
| Excited State<br><S**2>=0.000 | 37: | Singlet-AG | 5.4572 eV | 227.19 nm | f=0.0000 | <S**2>=0.000             |                     |           |           |          |
| 215 -> 238                    |     | 0.69902    |           |           |          | 212 -> 238               |                     | 0.69660   |           |          |
| Excited State<br><S**2>=0.000 | 38: | Singlet-AU | 5.4674 eV | 226.77 nm | f=0.0147 | Excited State 48:        | Singlet-AG          | 5.7406 eV | 215.98 nm | f=0.0000 |
| 230 -> 239                    |     | 0.53689    |           |           |          | <S**2>=0.000             |                     |           |           |          |
| 231 -> 239                    |     | 0.15871    |           |           |          | 233 -> 240               |                     | -0.45825  |           |          |
|                               |     |            |           |           |          | 234 -> 241               |                     | 0.52326   |           |          |

**Table S7. Transition Energy, Wavelength, and Oscillator Strengths of the Electronic Transition of  $\mathbf{6_{opt}}$**   
(The 237<sup>th</sup> orbital is highest occupied orbital)

|                                                                                   |           |           |           |          |                                   |           |           |           |          |
|-----------------------------------------------------------------------------------|-----------|-----------|-----------|----------|-----------------------------------|-----------|-----------|-----------|----------|
| Excited State 1:<br><S**2>=0.000                                                  | Singlet-A | 2.8294 eV | 438.21 nm | f=0.0119 | Excited State 12:<br><S**2>=0.000 | Singlet-A | 4.7404 eV | 261.55 nm | f=0.0779 |
| 235 -> 238                                                                        | -0.10313  |           |           |          | 232 -> 238                        | 0.58426   |           |           |          |
| 237 -> 238                                                                        | 0.55576   |           |           |          | 233 -> 238                        | -0.22881  |           |           |          |
| 237 -> 239                                                                        | 0.41018   |           |           |          | 235 -> 239                        | -0.20115  |           |           |          |
| This state for optimization and/or second-order correction.                       |           |           |           |          | 236 -> 240                        | -0.11054  |           |           |          |
| Total Energy, E(TD-HF/TD-KS) = -5662.96653789                                     |           |           |           |          | 236 -> 241                        | -0.13784  |           |           |          |
| Copying the excited state density for this state as the 1-particle RhoCI density. |           |           |           |          |                                   |           |           |           |          |
| Excited State 2:<br><S**2>=0.000                                                  | Singlet-A | 3.1085 eV | 398.86 nm | f=0.0270 | Excited State 13:<br><S**2>=0.000 | Singlet-A | 4.8290 eV | 256.75 nm | f=0.0029 |
| 235 -> 239                                                                        | 0.10704   |           |           |          | 231 -> 238                        | 0.66840   |           |           |          |
| 236 -> 238                                                                        | -0.11310  |           |           |          | 235 -> 239                        | -0.11868  |           |           |          |
| 237 -> 238                                                                        | -0.37316  |           |           |          | 236 -> 241                        | -0.12109  |           |           |          |
| 237 -> 239                                                                        | 0.55405   |           |           |          |                                   |           |           |           |          |
| Excited State 3:<br><S**2>=0.000                                                  | Singlet-A | 3.4281 eV | 361.67 nm | f=0.0118 | Excited State 14:<br><S**2>=0.000 | Singlet-A | 4.9788 eV | 249.02 nm | f=0.0933 |
| 235 -> 238                                                                        | -0.12710  |           |           |          | 229 -> 238                        | 0.11948   |           |           |          |
| 236 -> 238                                                                        | 0.66975   |           |           |          | 230 -> 238                        | -0.31436  |           |           |          |
| 237 -> 240                                                                        | 0.11911   |           |           |          | 234 -> 239                        | -0.14263  |           |           |          |
|                                                                                   |           |           |           |          | 235 -> 240                        | 0.55196   |           |           |          |
|                                                                                   |           |           |           |          | 236 -> 240                        | 0.11793   |           |           |          |
|                                                                                   |           |           |           |          | 237 -> 243                        | 0.10112   |           |           |          |
| Excited State 4:<br><S**2>=0.000                                                  | Singlet-A | 3.6728 eV | 337.57 nm | f=0.0041 | Excited State 15:<br><S**2>=0.000 | Singlet-A | 4.9925 eV | 248.34 nm | f=0.0229 |
| 236 -> 238                                                                        | -0.11450  |           |           |          | 230 -> 238                        | 0.58306   |           |           |          |
| 236 -> 239                                                                        | -0.21754  |           |           |          | 234 -> 239                        | 0.14760   |           |           |          |
| 237 -> 240                                                                        | 0.64817   |           |           |          | 235 -> 240                        | 0.31559   |           |           |          |
| Excited State 5:<br><S**2>=0.000                                                  | Singlet-A | 3.8813 eV | 319.44 nm | f=0.0282 | Excited State 16:<br><S**2>=0.000 | Singlet-A | 4.9980 eV | 248.07 nm | f=0.0014 |
| 235 -> 238                                                                        | -0.47416  |           |           |          | 230 -> 238                        | -0.19593  |           |           |          |
| 236 -> 238                                                                        | -0.10104  |           |           |          | 234 -> 239                        | 0.67251   |           |           |          |
| 236 -> 239                                                                        | 0.49811   |           |           |          |                                   |           |           |           |          |
| Excited State 6:<br><S**2>=0.000                                                  | Singlet-A | 3.9716 eV | 312.17 nm | f=0.0262 | Excited State 17:<br><S**2>=0.000 | Singlet-A | 5.0894 eV | 243.61 nm | f=0.0030 |
| 235 -> 238                                                                        | 0.44981   |           |           |          | 229 -> 238                        | 0.11075   |           |           |          |
| 235 -> 239                                                                        | -0.25459  |           |           |          | 233 -> 239                        | 0.68518   |           |           |          |
| 236 -> 239                                                                        | 0.39936   |           |           |          |                                   |           |           |           |          |
| 237 -> 238                                                                        | 0.11617   |           |           |          | Excited State 18:<br><S**2>=0.000 | Singlet-A | 5.1050 eV | 242.87 nm | f=0.0006 |
| 237 -> 240                                                                        | 0.17884   |           |           |          | 229 -> 238                        | 0.59390   |           |           |          |
| Excited State 7:<br><S**2>=0.000                                                  | Singlet-A | 4.3211 eV | 286.92 nm | f=0.0086 | 230 -> 238                        | 0.11099   |           |           |          |
| 235 -> 239                                                                        | 0.13699   |           |           |          | 232 -> 239                        | -0.32523  |           |           |          |
| 237 -> 241                                                                        | 0.68537   |           |           |          | Excited State 19:<br><S**2>=0.000 | Singlet-A | 5.1132 eV | 242.48 nm | f=0.0027 |
| Excited State 8:<br><S**2>=0.000                                                  | Singlet-A | 4.4902 eV | 276.12 nm | f=0.0230 | 229 -> 238                        | 0.31238   |           |           |          |
| 232 -> 238                                                                        | -0.11710  |           |           |          | 232 -> 239                        | 0.61292   |           |           |          |
| 235 -> 239                                                                        | -0.43612  |           |           |          | Excited State 20:<br><S**2>=0.000 | Singlet-A | 5.1707 eV | 239.78 nm | f=0.0312 |
| 236 -> 240                                                                        | 0.48258   |           |           |          | 231 -> 239                        | 0.67103   |           |           |          |
| 237 -> 241                                                                        | 0.10130   |           |           |          | 236 -> 241                        | 0.15682   |           |           |          |
| Excited State 9:<br><S**2>=0.000                                                  | Singlet-A | 4.5790 eV | 270.77 nm | f=0.0479 | Excited State 21:<br><S**2>=0.000 | Singlet-A | 5.2568 eV | 235.85 nm | f=0.0182 |
| 232 -> 238                                                                        | 0.12873   |           |           |          | 236 -> 241                        | -0.17062  |           |           |          |
| 234 -> 238                                                                        | 0.59681   |           |           |          | 237 -> 242                        | 0.42620   |           |           |          |
| 235 -> 239                                                                        | 0.13107   |           |           |          | 237 -> 243                        | 0.40154   |           |           |          |
| 236 -> 240                                                                        | 0.28444   |           |           |          | 237 -> 244                        | -0.14640  |           |           |          |
| Excited State 10:<br><S**2>=0.000                                                 | Singlet-A | 4.6190 eV | 268.42 nm | f=0.1284 | 237 -> 245                        | 0.18943   |           |           |          |
| 231 -> 238                                                                        | -0.15323  |           |           |          | 237 -> 246                        | -0.16629  |           |           |          |
| 232 -> 238                                                                        | -0.29016  |           |           |          | Excited State 22:<br><S**2>=0.000 | Singlet-A | 5.3215 eV | 232.99 nm | f=0.0294 |
| 234 -> 238                                                                        | 0.36315   |           |           |          | 224 -> 238                        | 0.11823   |           |           |          |
| 235 -> 239                                                                        | -0.27410  |           |           |          | 226 -> 238                        | -0.19520  |           |           |          |
| 235 -> 240                                                                        | 0.15939   |           |           |          | 227 -> 238                        | 0.20345   |           |           |          |
| 236 -> 240                                                                        | -0.32784  |           |           |          | 228 -> 238                        | 0.54467   |           |           |          |
| 236 -> 241                                                                        | -0.11324  |           |           |          | 236 -> 241                        | -0.25899  |           |           |          |
| Excited State 11:<br><S**2>=0.000                                                 | Singlet-A | 4.7169 eV | 262.85 nm | f=0.0219 | Excited State 23:<br><S**2>=0.000 | Singlet-A | 5.3579 eV | 231.40 nm | f=0.0493 |
| 232 -> 238                                                                        | 0.16718   |           |           |          | 222 -> 238                        | -0.13098  |           |           |          |
| 233 -> 238                                                                        | 0.65947   |           |           |          | 226 -> 238                        | 0.17550   |           |           |          |
| 235 -> 239                                                                        | -0.10812  |           |           |          | 227 -> 238                        | -0.33953  |           |           |          |

|               |          |           |           |           |          |               |          |           |           |           |          |
|---------------|----------|-----------|-----------|-----------|----------|---------------|----------|-----------|-----------|-----------|----------|
| 228 -> 238    | 0.39113  |           |           |           |          | 229 -> 239    | -0.21542 |           |           |           |          |
| 230 -> 239    | 0.16730  |           |           |           |          | 234 -> 240    | 0.62294  |           |           |           |          |
| 236 -> 241    | 0.30798  |           |           |           |          |               |          |           |           |           |          |
| Excited State | 24:      | Singlet-A | 5.3723 eV | 230.78 nm | f=0.0327 | Excited State | 33:      | Singlet-A | 5.5728 eV | 222.48 nm | f=0.0008 |
| <S**2>=0.000  |          |           |           |           |          | <S**2>=0.000  |          |           |           |           |          |
| 225 -> 238    | 0.24705  |           |           |           |          | 220 -> 238    | -0.24675 |           |           |           |          |
| 227 -> 238    | 0.43905  |           |           |           |          | 221 -> 238    | 0.50277  |           |           |           |          |
| 230 -> 239    | 0.34197  |           |           |           |          | 222 -> 238    | -0.34434 |           |           |           |          |
| 236 -> 241    | 0.20959  |           |           |           |          | 224 -> 238    | -0.13720 |           |           |           |          |
| 237 -> 242    | 0.15964  |           |           |           |          |               |          |           |           |           |          |
| Excited State | 25:      | Singlet-A | 5.3798 eV | 230.46 nm | f=0.0175 | Excited State | 34:      | Singlet-A | 5.5845 eV | 222.02 nm | f=0.0096 |
| <S**2>=0.000  |          |           |           |           |          | <S**2>=0.000  |          |           |           |           |          |
| 225 -> 238    | -0.24750 |           |           |           |          | 232 -> 240    | -0.12341 |           |           |           |          |
| 226 -> 238    | -0.10062 |           |           |           |          | 235 -> 241    | -0.11700 |           |           |           |          |
| 227 -> 238    | -0.18094 |           |           |           |          | 237 -> 243    | 0.31238  |           |           |           |          |
| 229 -> 239    | -0.11187 |           |           |           |          | 237 -> 244    | 0.44435  |           |           |           |          |
| 230 -> 239    | 0.52751  |           |           |           |          | 237 -> 246    | 0.29082  |           |           |           |          |
| 236 -> 241    | -0.21771 |           |           |           |          | 237 -> 248    | 0.17765  |           |           |           |          |
| Excited State | 26:      | Singlet-A | 5.4182 eV | 228.83 nm | f=0.0225 | Excited State | 35:      | Singlet-A | 5.5998 eV | 221.41 nm | f=0.0016 |
| <S**2>=0.000  |          |           |           |           |          | <S**2>=0.000  |          |           |           |           |          |
| 225 -> 238    | 0.44183  |           |           |           |          | 220 -> 238    | -0.19042 |           |           |           |          |
| 226 -> 238    | 0.15461  |           |           |           |          | 221 -> 238    | 0.29492  |           |           |           |          |
| 227 -> 238    | -0.10278 |           |           |           |          | 222 -> 238    | 0.53253  |           |           |           |          |
| 230 -> 239    | 0.17462  |           |           |           |          | 223 -> 238    | 0.15381  |           |           |           |          |
| 236 -> 241    | -0.15071 |           |           |           |          | 224 -> 238    | 0.16191  |           |           |           |          |
| 237 -> 242    | -0.29685 |           |           |           |          |               |          |           |           |           |          |
| 237 -> 243    | 0.20069  |           |           |           |          | Excited State | 36:      | Singlet-A | 5.6259 eV | 220.38 nm | f=0.0035 |
| 237 -> 245    | -0.13121 |           |           |           |          | <S**2>=0.000  |          |           |           |           |          |
| Excited State | 27:      | Singlet-A | 5.4355 eV | 228.10 nm | f=0.0282 | 219 -> 238    | 0.22338  |           |           |           |          |
| <S**2>=0.000  |          |           |           |           |          | 220 -> 238    | 0.25045  |           |           |           |          |
| 225 -> 238    | -0.33763 |           |           |           |          | 231 -> 240    | 0.15327  |           |           |           |          |
| 226 -> 238    | 0.43156  |           |           |           |          | 232 -> 240    | 0.50023  |           |           |           |          |
| 227 -> 238    | 0.28293  |           |           |           |          | 233 -> 240    | 0.12924  |           |           |           |          |
| 230 -> 239    | 0.10945  |           |           |           |          | 237 -> 244    | 0.13905  |           |           |           |          |
| 237 -> 242    | -0.15740 |           |           |           |          | Excited State | 37:      | Singlet-A | 5.6441 eV | 219.67 nm | f=0.0082 |
| 237 -> 243    | 0.18101  |           |           |           |          | <S**2>=0.000  |          |           |           |           |          |
| 237 -> 244    | -0.10193 |           |           |           |          | 219 -> 238    | 0.61858  |           |           |           |          |
|               |          |           |           |           |          | 232 -> 240    | -0.24289 |           |           |           |          |
| Excited State | 28:      | Singlet-A | 5.4482 eV | 227.57 nm | f=0.1172 | Excited State | 38:      | Singlet-A | 5.6499 eV | 219.45 nm | f=0.0113 |
| <S**2>=0.000  |          |           |           |           |          | <S**2>=0.000  |          |           |           |           |          |
| 225 -> 238    | 0.12299  |           |           |           |          | 218 -> 238    | -0.31698 |           |           |           |          |
| 226 -> 238    | 0.40380  |           |           |           |          | 219 -> 238    | -0.13618 |           |           |           |          |
| 229 -> 239    | -0.21172 |           |           |           |          | 220 -> 238    | 0.46518  |           |           |           |          |
| 236 -> 241    | -0.17410 |           |           |           |          | 221 -> 238    | 0.27141  |           |           |           |          |
| 237 -> 242    | 0.20221  |           |           |           |          | 232 -> 240    | -0.21428 |           |           |           |          |
| 237 -> 243    | -0.30213 |           |           |           |          |               |          |           |           |           |          |
| 237 -> 244    | 0.19641  |           |           |           |          | Excited State | 39:      | Singlet-A | 5.6580 eV | 219.13 nm | f=0.0023 |
|               |          |           |           |           |          | <S**2>=0.000  |          |           |           |           |          |
| Excited State | 29:      | Singlet-A | 5.4948 eV | 225.64 nm | f=0.0120 | 219 -> 238    | -0.12110 |           |           |           |          |
| <S**2>=0.000  |          |           |           |           |          | 235 -> 241    | -0.21434 |           |           |           |          |
| 223 -> 238    | 0.26757  |           |           |           |          | 237 -> 242    | -0.27924 |           |           |           |          |
| 229 -> 239    | 0.57807  |           |           |           |          | 237 -> 244    | 0.11091  |           |           |           |          |
| 234 -> 240    | 0.18565  |           |           |           |          | 237 -> 245    | 0.38376  |           |           |           |          |
| 237 -> 243    | -0.10711 |           |           |           |          | 237 -> 246    | -0.33587 |           |           |           |          |
|               |          |           |           |           |          | 237 -> 247    | 0.11529  |           |           |           |          |
| Excited State | 30:      | Singlet-A | 5.5149 eV | 224.82 nm | f=0.0159 | 237 -> 248    | 0.11496  |           |           |           |          |
| <S**2>=0.000  |          |           |           |           |          | 237 -> 250    | 0.11578  |           |           |           |          |
| 222 -> 238    | -0.18300 |           |           |           |          |               |          |           |           |           |          |
| 223 -> 238    | 0.44787  |           |           |           |          | Excited State | 40:      | Singlet-A | 5.7148 eV | 216.95 nm | f=0.0042 |
| 224 -> 238    | 0.38222  |           |           |           |          | <S**2>=0.000  |          |           |           |           |          |
| 226 -> 238    | -0.11551 |           |           |           |          | 215 -> 238    | 0.14424  |           |           |           |          |
| 228 -> 238    | -0.11574 |           |           |           |          | 216 -> 238    | 0.23376  |           |           |           |          |
| 229 -> 239    | -0.15239 |           |           |           |          | 218 -> 238    | 0.52346  |           |           |           |          |
| 234 -> 240    | -0.17387 |           |           |           |          | 219 -> 238    | -0.12278 |           |           |           |          |
|               |          |           |           |           |          | 220 -> 238    | 0.23051  |           |           |           |          |
| Excited State | 31:      | Singlet-A | 5.5304 eV | 224.19 nm | f=0.0152 | 233 -> 240    | -0.12144 |           |           |           |          |
| <S**2>=0.000  |          |           |           |           |          | 237 -> 244    | 0.10391  |           |           |           |          |
| 222 -> 238    | -0.10745 |           |           |           |          | 237 -> 246    | -0.12245 |           |           |           |          |
| 223 -> 238    | -0.36817 |           |           |           |          |               |          |           |           |           |          |
| 224 -> 238    | 0.51736  |           |           |           |          | Excited State | 41:      | Singlet-A | 5.7232 eV | 216.63 nm | f=0.0030 |
| 225 -> 238    | -0.10285 |           |           |           |          | <S**2>=0.000  |          |           |           |           |          |
| 229 -> 239    | 0.10611  |           |           |           |          | 217 -> 238    | 0.13852  |           |           |           |          |
| 234 -> 240    | 0.13521  |           |           |           |          | 232 -> 240    | -0.19315 |           |           |           |          |
|               |          |           |           |           |          | 233 -> 240    | 0.61481  |           |           |           |          |
|               |          |           |           |           |          | 237 -> 246    | -0.10804 |           |           |           |          |
| Excited State | 32:      | Singlet-A | 5.5370 eV | 223.92 nm | f=0.0529 | Excited State | 42:      | Singlet-A | 5.7277 eV | 216.46 nm | f=0.0025 |
| <S**2>=0.000  |          |           |           |           |          | <S**2>=0.000  |          |           |           |           |          |
| 223 -> 238    | 0.13264  |           |           |           |          |               |          |           |           |           |          |

|                   |          |           |           |           |          |                   |          |           |           |           |          |
|-------------------|----------|-----------|-----------|-----------|----------|-------------------|----------|-----------|-----------|-----------|----------|
| 217 -> 238        | -0.28535 |           |           |           |          | 217 -> 238        | -0.15022 |           |           |           |          |
| 218 -> 238        | 0.20137  |           |           |           |          | 218 -> 238        | -0.18423 |           |           |           |          |
| 220 -> 238        | 0.14849  |           |           |           |          | 220 -> 238        | -0.10008 |           |           |           |          |
| 233 -> 240        | 0.22360  |           |           |           |          | 221 -> 238        | -0.17573 |           |           |           |          |
| 237 -> 244        | -0.26014 |           |           |           |          | 228 -> 239        | 0.21036  |           |           |           |          |
| 237 -> 245        | 0.26557  |           |           |           |          |                   |          |           |           |           |          |
| 237 -> 246        | 0.32409  |           |           |           |          |                   |          |           |           |           |          |
|                   |          |           |           |           |          | Excited State 46: |          | Singlet-A | 5.7766 eV | 214.63 nm | f=0.0126 |
|                   |          |           |           |           |          | <S**2>=0.000      |          |           |           |           |          |
| Excited State 43: |          | Singlet-A | 5.7377 eV | 216.09 nm | f=0.0006 | 216 -> 238        | -0.14718 |           |           |           |          |
| <S**2>=0.000      |          |           |           |           |          | 218 -> 238        | 0.10519  |           |           |           |          |
| 215 -> 238        | 0.22025  |           |           |           |          | 228 -> 239        | 0.61731  |           |           |           |          |
| 217 -> 238        | 0.53744  |           |           |           |          | 231 -> 240        | -0.11223 |           |           |           |          |
| 237 -> 244        | -0.11694 |           |           |           |          | 235 -> 241        | -0.11925 |           |           |           |          |
| 237 -> 245        | 0.22823  |           |           |           |          |                   |          |           |           |           |          |
| 237 -> 246        | 0.21316  |           |           |           |          | Excited State 47: |          | Singlet-A | 5.7791 eV | 214.54 nm | f=0.0131 |
|                   |          |           |           |           |          | <S**2>=0.000      |          |           |           |           |          |
| Excited State 44: |          | Singlet-A | 5.7490 eV | 215.66 nm | f=0.1020 | 226 -> 239        | -0.21446 |           |           |           |          |
| <S**2>=0.000      |          |           |           |           |          | 227 -> 239        | 0.63865  |           |           |           |          |
| 225 -> 239        | -0.13323 |           |           |           |          | 235 -> 241        | -0.11092 |           |           |           |          |
| 226 -> 239        | -0.13273 |           |           |           |          |                   |          |           |           |           |          |
| 228 -> 239        | 0.19045  |           |           |           |          | Excited State 48: |          | Singlet-A | 5.8101 eV | 213.39 nm | f=0.0236 |
| 235 -> 241        | 0.47476  |           |           |           |          | <S**2>=0.000      |          |           |           |           |          |
| 237 -> 244        | 0.18679  |           |           |           |          | 215 -> 238        | -0.13203 |           |           |           |          |
| 237 -> 245        | 0.25687  |           |           |           |          | 231 -> 240        | 0.61093  |           |           |           |          |
| 237 -> 248        | -0.13173 |           |           |           |          | 232 -> 240        | -0.19066 |           |           |           |          |
|                   |          |           |           |           |          | 237 -> 245        | -0.10795 |           |           |           |          |
| Excited State 45: |          | Singlet-A | 5.7659 eV | 215.03 nm | f=0.0003 |                   |          |           |           |           |          |
| <S**2>=0.000      |          |           |           |           |          |                   |          |           |           |           |          |
| 215 -> 238        | 0.10807  |           |           |           |          |                   |          |           |           |           |          |
| 216 -> 238        | 0.56521  |           |           |           |          |                   |          |           |           |           |          |

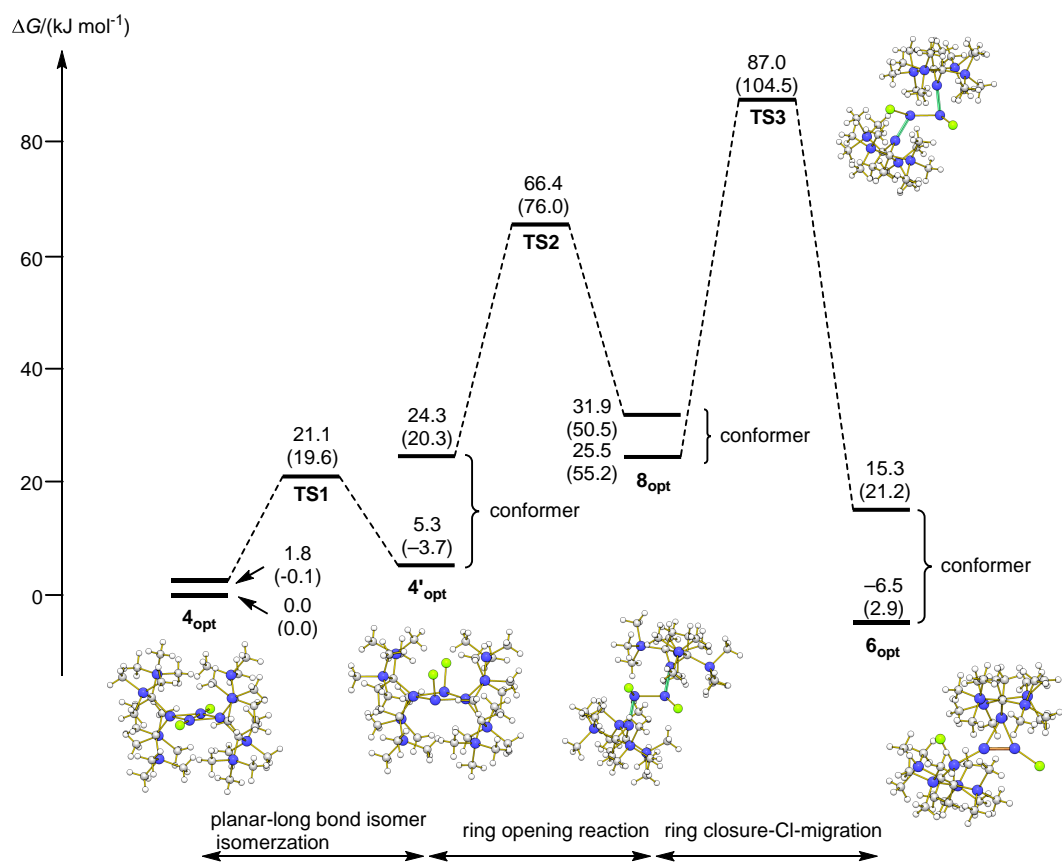

**Figure S25.** A possible reaction route between  $4_{opt}$  and  $6_{opt}$  calculated at the B3LYP-D3/B1 (basis B1: 6-311G(d) [core  $\text{Si}_4\text{Cl}_2$ ], 6-31G(d) [carbon atoms in silacyclopentane rings], 3-21G\* [others]).

## 5. Preliminary estimation of the thermodynamic parameters for the equilibrium between **4** and **6**

In the  $^1\text{H}$  NMR spectrum of a mixture of bicyclo[1.1.0]tetrasilane **4** and cyclotrisilene **6**, the signals due to four  $\text{SiMe}_3$  groups (36 H) of **6** were substantially broadened and overlapped with that due to eight  $\text{SiMe}_3$  groups (72H) of **4** (Figure S26). Assuming that only signals of **4** and **6** were overlapped in this region, the equilibrium constants  $K_{\text{eq}}$  ( $= [\mathbf{6}]:[\mathbf{4}]$ ) were determined by using the integral ratio of the  $\text{SiMe}_3$  signals of  $^1\text{H}$  NMR spectra in  $\text{C}_6\text{D}_6$  (Table S8). A plot of  $\ln K_{\text{eq}}$  at various reciprocal temperatures are shown in Figure S27. The thermodynamic parameters for the isomerisation of **4** to **6** are calculated to be  $\Delta H = +14.6 \pm 2.9 \text{ kJ mol}^{-1}$  and  $\Delta S = +49 \pm 9 \text{ J K}^{-1} \text{ mol}^{-1}$ .

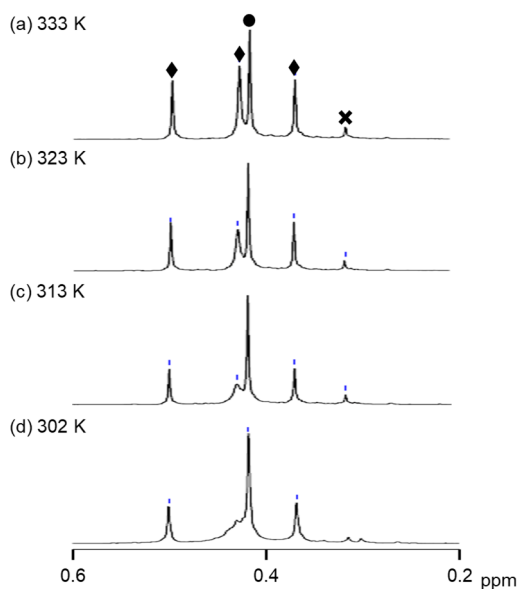

**Figure S26.**  $^1\text{H}$  NMR spectra (TMS region) of a mixture of **4** and **6** in benzene- $d_6$  at (a) 333 K, (b) 323 K, (c) 313 K, and (d) 302 K ( $\bullet = \mathbf{4}$ ,  $\blacklozenge = \mathbf{6}$ ,  $\times = \mathbf{1}$ ).

**Table S8.** The Equilibrium Constants  $K_{\text{eq}}$  ( $= [\mathbf{6}]:[\mathbf{4}]$ ) in Benzene- $d_6$  at Various Temperatures

| Temperature/K | Integral ratio (SiMe <sub>3</sub> ) |                         | $K_{\text{eq}}$ ( $=[\mathbf{6}]:[\mathbf{4}]$ ) <sup>a</sup> |
|---------------|-------------------------------------|-------------------------|---------------------------------------------------------------|
|               | bicyclotetrasilane <b>4</b>         | cyclotrisilene <b>6</b> |                                                               |
| 333           | 2.11                                | 4.00                    | 1.90                                                          |
| 323           | 2.36                                | 4.00                    | 1.69                                                          |
| 313           | 3.24                                | 4.00                    | 1.23                                                          |
| 302           | 3.48                                | 4.00                    | 1.15                                                          |

*a.* Equilibrium constants ( $K_{\text{eq}}$ ) were calculated using the integral ratio of SiMe<sub>3</sub> proton signals in the <sup>1</sup>H NMR spectrum.

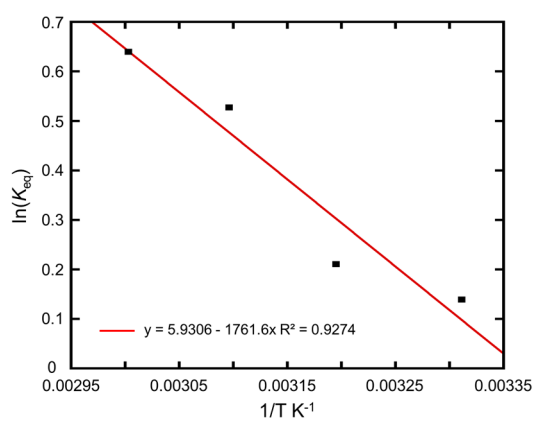

**Figure S27.** A plot of  $\ln(K_{\text{eq}})$  vs  $1/T$ .
